# Supplementary material
Source: publisher site journal article supplement (https://www.dovepress.com/get_supplementary_file.php?f=401764.xlsx)
Supplement: Supplementary file 1 [file get_supplementary_file.php]

## Sheet: Sheet1
Supplementary Materials
X1	X2	X3	X4	X5	X6	X7	X8	X9	X10	X11	X12	X13	X14	X15	X16	X17	X18	X19	X20	X21	X22	X23	X24	X25	X26	X27	X28	X29	X30	X31	X32	X33	X34	X35	X36	X37	X39	X40	X41	X42	X43	X44	X45	X46	X47	X49	X50	X51
0	22	2	0	0	0	0	1	1	0	1	0	0	0	0	0	0	0	0	0	0	0	5	6	6	4	1	5	6	6	5	5	5	4	3	5	5	1	1	1	1	1	1	1	1	1	6	2	0
1	23	0	0	0	1	0	1	1	1	1	0	0	0	0	0	0	0	0	0	0	0	6	6	5	6	5	5	5	5	5	5	5	6	5	6	6	1	1	1	1	1	1	1	1	1	4	2	0
1	36	1	2	0	3	1	0	1	0	1	0	0	0	1	3	0	0	0	0	0	0	6	6	6	6	6	6	6	6	6	6	6	6	6	6	1	1	1	1	1	1	1	1	1	1	6	2	0
1	34	0	1	2	3	1	0	1	2	4	1	2	2	2	2	2	1	0	0	0	0	6	6	6	6	5	5	5	6	6	6	6	6	6	6	6	1	1	1	1	1	1	1	1	1	0	2	0
1	33	1	1	2	2	1	2	0	0	1	0	0	0	0	0	0	0	0	0	0	0	6	6	6	6	6	6	6	6	6	6	6	6	5	5	5	1	1	1	1	1	1	1	1	1	8	2	0
1	36	1	1	2	3	1	1	0	0	1	0	0	0	0	0	0	0	0	0	0	0	6	6	6	6	6	5	6	6	6	6	6	6	6	6	6	1	1	1	1	1	1	1	1	1	0	2	0
1	26	1	1	0	1	0	1	1	1	2	1	1	1	1	0	1	0	0	0	0	0	6	6	6	6	6	6	6	6	6	6	6	6	6	6	6	1	1	1	1	1	1	1	1	1	4	2	0
1	33	0	1	1	3	0	2	0	0	1	0	0	0	0	0	0	0	0	0	0	0	6	6	6	6	6	6	6	6	6	6	6	6	6	6	6	1	1	1	1	1	1	1	1	1	0	2	0
1	26	1	0	0	2	0	1	0	0	1	0	0	0	0	0	0	0	0	0	0	0	6	6	6	6	6	6	6	6	6	6	6	6	6	6	6	1	1	1	1	1	1	1	1	1	0	2	0
1	33	1	1	1	3	1	1	0	0	1	0	0	0	0	3	0	0	0	0	0	0	6	6	6	6	6	6	6	6	6	6	6	6	6	6	6	1	1	1	1	1	1	1	1	1	8	2	0
1	27	1	0	0	2	0	1	1	1	1	0	0	0	1	0	1	0	0	0	0	0	5	5	5	5	6	3	6	6	6	6	6	6	6	6	4	2	1	1	1	1	1	1	1	1	0	2	0
1	33	1	1	1	3	1	1	1	0	1	0	0	0	0	3	0	0	0	0	0	0	6	6	6	6	6	3	6	6	6	6	3	6	6	6	6	1	2	1	1	1	1	1	1	1	8	2	0
1	26	1	0	0	1	0	1	0	0	2	0	0	0	1	3	1	0	0	0	0	0	6	6	6	6	6	6	6	6	6	6	6	6	6	6	5	1	1	1	2	1	1	1	1	1	5	2	0
1	37	1	1	2	3	1	1	0	0	2	1	0	0	1	1	0	0	0	0	0	0	6	6	6	6	1	3	6	6	6	6	6	6	6	6	6	1	1	1	1	3	1	1	1	1	8	2	0
1	39	1	1	2	3	1	1	0	0	1	0	0	0	0	0	0	0	0	0	0	0	6	6	6	6	6	5	6	6	5	6	5	6	6	6	5	1	2	1	1	1	2	1	1	1	2	2	0
1	29	1	1	1	2	1	0	0	1	1	0	0	0	0	3	1	0	0	0	0	0	6	6	6	6	6	6	6	6	6	6	6	6	6	6	3	2	2	1	1	1	1	1	1	1	8	2	0
1	32	1	1	1	3	0	1	0	0	1	0	0	0	0	0	0	0	0	0	0	0	6	6	6	6	6	6	6	6	6	6	6	6	6	6	6	1	1	1	2	1	1	1	2	1	6	2	0
1	30	1	1	1	3	0	1	1	0	1	1	0	0	0	1	0	0	0	0	0	0	6	6	6	6	6	6	6	6	6	6	6	6	6	6	6	3	1	1	1	1	1	1	1	1	6	2	0
1	33	1	1	2	3	0	1	0	0	2	2	0	0	0	3	0	0	0	0	0	0	6	6	6	6	6	3	6	6	6	6	3	6	6	6	3	3	2	1	1	1	1	1	1	1	6	2	0
1	38	1	1	2	3	1	1	0	0	1	0	0	0	0	3	0	0	0	0	0	0	6	6	6	6	6	5	6	6	6	6	6	6	6	6	6	3	1	2	2	1	1	1	1	1	8	2	0
1	30	1	1	2	2	0	1	0	0	1	0	0	0	0	0	0	0	0	0	0	0	6	6	6	6	6	6	6	6	6	6	6	6	6	6	6	1	1	1	5	1	1	1	1	1	0	2	0
1	25	1	1	0	2	0	1	0	0	1	0	0	0	0	0	0	0	0	0	0	0	6	6	6	6	6	6	6	6	6	6	6	6	6	6	6	1	1	1	5	1	1	1	1	1	0	2	0
0	21	0	0	0	0	0	1	1	1	2	1	1	0	1	3	0	0	0	0	0	0	6	6	6	6	6	6	6	6	6	6	6	6	6	6	3	5	2	1	1	1	1	1	1	1	0	2	0
1	30	1	1	1	2	1	1	0	0	1	0	0	0	0	1	0	0	0	0	0	0	6	6	6	6	6	6	6	6	6	6	6	6	6	6	6	2	1	1	5	1	1	1	1	1	0	2	0
1	38	1	1	1	3	1	0	1	1	4	3	1	1	1	1	1	0	0	0	0	0	2	3	2	3	2	1	2	3	2	2	3	2	1	1	2	3	3	2	2	1	1	1	1	1	2	0	0
1	32	1	2	1	3	0	1	1	1	2	1	0	0	0	3	0	0	0	0	0	0	3	3	3	2	2	6	6	6	3	3	3	3	3	3	3	1	1	1	1	4	4	1	1	1	3	1	0
1	33	1	1	2	3	0	1	1	1	1	0	0	0	0	0	0	0	0	0	0	0	5	5	6	6	5	6	6	6	6	6	5	6	4	5	6	1	2	2	3	2	2	1	1	1	6	2	0
1	32	1	0	0	2	0	1	0	0	1	0	0	0	0	0	0	0	0	0	0	0	6	6	6	6	6	6	6	6	6	6	6	6	6	6	5	2	2	1	2	2	1	2	2	1	8	2	0
1	40	0	1	1	4	1	1	0	1	2	1	0	0	0	1	1	0	0	0	0	0	6	6	6	6	6	6	6	6	6	6	6	6	6	6	6	1	1	1	2	2	2	2	2	2	2	2	0
1	33	1	1	1	3	1	1	0	0	1	0	0	0	0	0	0	0	0	0	0	0	6	6	6	6	6	3	6	6	6	6	6	6	6	6	6	5	4	1	1	1	1	1	1	1	8	2	0
1	41	0	1	2	3	0	1	1	0	1	0	0	0	1	1	0	0	0	0	0	0	6	6	6	6	6	4	6	6	6	6	6	6	6	5	6	2	2	1	1	2	2	2	2	2	8	2	0
1	30	1	1	1	3	1	1	0	1	1	0	0	0	0	0	1	0	0	0	0	0	5	6	6	6	6	5	6	6	5	6	6	5	6	5	5	4	2	1	2	2	2	1	2	1	1	2	0
1	30	1	1	2	2	1	0	1	1	2	1	1	0	1	3	1	1	0	1	0	0	5	6	6	3	4	3	6	5	5	3	3	3	3	4	3	2	1	2	2	2	2	2	2	2	6	1	0
1	34	0	1	2	4	0	1	0	0	1	0	0	0	0	0	0	0	0	0	0	0	6	6	6	6	6	6	6	6	3	3	3	3	6	3	3	4	4	1	1	2	2	1	2	1	6	2	0
1	38	1	1	1	3	1	1	0	0	1	0	0	0	0	0	0	0	0	0	0	0	6	6	6	6	6	3	6	6	6	6	6	6	6	6	6	4	4	1	1	1	4	1	1	1	6	2	0
1	38	0	1	2	3	1	1	1	1	1	0	0	0	0	3	0	0	0	0	0	0	3	6	6	4	6	2	3	6	6	6	3	6	6	6	6	2	2	2	2	2	2	2	2	2	0	2	0
0	27	1	0	0	1	0	1	1	1	1	0	0	0	0	0	2	0	0	0	0	0	5	5	5	5	5	5	5	5	5	5	5	5	5	5	5	2	2	2	2	2	2	2	2	2	2	2	0
1	35	1	1	1	3	0	1	0	0	1	0	0	0	0	0	0	0	0	0	0	0	6	6	6	6	3	6	6	6	6	6	6	6	6	6	3	2	2	2	2	2	2	2	2	2	1	2	0
1	20	0	0	0	0	0	1	0	1	1	1	1	0	1	3	0	1	0	0	0	0	6	6	6	6	6	4	6	6	6	5	6	6	6	6	6	2	1	1	2	3	3	3	1	2	5	2	0
1	24	0	0	0	0	0	1	0	0	1	0	0	0	0	0	0	0	0	1	0	0	6	6	6	6	6	6	6	6	6	6	6	6	6	6	6	2	2	2	2	2	2	2	2	2	8	2	0
1	23	0	0	0	0	0	2	1	0	1	0	0	0	0	0	0	0	0	0	0	0	6	6	6	6	6	6	6	6	6	6	6	6	6	6	6	2	2	2	2	2	2	2	2	2	0	2	0
1	31	1	1	0	2	1	1	0	0	1	0	0	0	0	0	0	0	0	0	0	0	5	5	5	5	4	5	5	5	5	5	5	5	4	4	5	2	2	3	2	2	2	2	2	2	8	2	0
1	36	1	0	0	3	1	1	0	0	1	0	0	0	0	0	0	0	0	0	0	0	6	5	5	5	5	1	5	6	6	6	3	5	5	5	6	5	1	1	2	2	2	2	2	2	0	2	0
1	31	1	1	2	3	1	1	1	1	2	1	1	1	1	1	1	0	0	0	0	0	6	6	6	6	6	6	6	6	6	6	6	6	6	6	6	3	2	2	2	2	2	2	2	2	0	2	0
1	36	1	1	2	3	1	1	0	0	1	0	0	0	0	0	1	0	0	0	0	0	6	6	6	3	3	3	6	6	6	6	3	3	6	6	6	4	3	2	3	2	2	1	2	1	0	2	0
1	36	1	1	1	3	2	2	0	0	1	0	0	0	0	0	0	0	0	0	0	0	5	4	6	3	3	3	4	3	4	4	3	4	3	3	3	4	2	4	2	2	1	1	2	2	5	1	0
1	35	1	1	2	3	0	1	0	0	1	0	0	0	0	0	0	0	0	0	0	0	6	6	6	3	3	3	6	6	6	6	6	5	6	3	3	4	1	1	3	1	3	3	2	2	0	2	0
1	25	0	0	0	1	0	1	0	0	1	0	1	1	0	0	0	0	0	0	0	0	5	5	5	5	5	5	5	5	5	5	5	5	5	5	5	5	3	1	1	2	2	2	2	2	0	2	0
1	32	0	2	2	3	0	1	1	0	1	1	0	0	0	2	0	0	0	0	0	0	5	5	6	5	4	6	6	6	5	6	5	4	5	5	5	5	2	1	2	2	2	2	2	2	3	2	0
1	22	0	0	0	0	0	1	0	0	1	0	0	0	0	0	0	0	0	0	0	0	6	6	6	6	6	6	6	6	6	6	6	6	6	6	6	3	2	1	4	2	2	2	2	2	8	2	0
1	40	0	1	2	3	0	1	0	2	1	0	0	0	0	1	1	0	0	0	0	0	3	6	6	6	6	3	6	6	3	4	3	3	3	3	3	6	2	2	6	1	1	1	1	1	0	1	0
1	30	1	0	0	3	1	1	0	0	1	0	0	0	0	0	0	0	0	0	0	0	6	6	6	3	6	3	6	6	6	6	6	6	6	6	4	5	2	2	3	2	3	1	2	1	8	2	0
1	32	0	1	2	3	1	1	0	0	1	0	0	0	0	1	0	0	0	0	0	0	6	6	6	6	6	6	6	6	6	6	6	6	6	6	6	4	4	4	4	1	1	1	1	1	5	2	0
1	32	1	1	1	2	0	1	1	2	2	1	0	0	0	2	0	0	0	0	0	0	6	6	6	6	6	6	6	6	6	6	6	6	6	6	6	1	1	4	4	4	4	1	1	1	0	2	0
1	33	1	1	2	3	1	1	0	2	1	0	0	0	1	1	1	0	0	0	0	0	5	5	5	2	4	3	5	5	5	5	4	5	5	5	4	1	1	1	2	4	4	4	2	2	5	2	0
1	33	1	1	2	3	0	1	1	0	1	0	0	0	0	0	1	0	0	0	0	0	6	6	6	3	6	1	5	6	6	6	6	6	6	6	1	2	4	2	3	2	2	2	2	2	5	2	0
1	32	1	1	2	3	1	1	0	0	1	0	0	0	0	0	0	0	0	0	0	0	6	6	6	3	6	6	6	6	6	6	6	6	3	3	3	4	1	1	2	1	4	4	2	2	0	2	0
1	36	1	1	1	3	1	1	1	0	2	0	0	0	0	3	0	0	0	0	0	0	5	6	6	6	6	4	4	6	5	6	5	5	6	5	6	2	2	2	3	3	3	2	2	2	6	2	0
1	26	1	0	0	2	0	1	0	0	1	0	0	0	0	0	0	0	0	0	0	0	6	6	6	6	6	6	6	1	6	3	3	3	6	3	6	1	1	2	2	3	3	3	3	3	3	2	0
1	29	1	0	0	2	0	2	0	0	1	0	0	0	0	0	0	0	0	0	0	0	4	4	6	2	3	4	5	6	4	6	3	4	4	4	4	5	2	4	4	2	2	1	1	1	6	1	0
1	29	1	0	0	2	0	1	1	0	1	0	0	0	0	0	0	0	0	0	0	0	6	6	6	6	6	3	6	6	5	6	6	6	3	6	6	5	3	5	4	1	1	1	1	1	8	2	0
1	25	0	1	1	1	0	1	0	0	1	0	0	0	0	2	0	0	0	0	0	0	6	6	6	6	3	6	6	6	6	6	6	6	6	6	3	4	6	1	6	1	1	1	1	1	5	2	0
1	42	0	1	2	4	1	1	0	1	1	0	0	0	0	0	1	0	0	0	0	0	3	3	6	3	3	4	3	6	6	3	6	3	3	3	3	6	2	2	2	2	2	2	2	2	3	1	0
1	30	1	1	1	2	0	1	1	1	1	0	1	1	0	0	1	0	0	0	0	0	6	6	6	6	2	5	6	6	6	6	3	5	6	6	6	6	2	2	2	2	2	2	2	2	8	2	0
1	33	1	1	1	3	1	1	0	0	1	0	0	0	0	0	0	0	0	0	0	0	6	6	6	6	6	6	6	6	6	6	6	6	6	6	6	4	4	2	2	2	2	2	2	2	5	2	0
1	32	1	1	2	3	1	1	1	1	3	1	2	1	2	3	0	0	0	0	0	0	6	6	6	6	6	6	6	6	6	6	6	6	6	6	6	2	2	2	2	3	3	2	3	3	0	2	0
1	25	1	0	0	0	0	1	0	0	2	1	0	0	1	3	0	0	0	0	0	0	5	5	5	3	5	2	5	6	5	3	2	2	2	2	1	5	3	4	2	2	2	2	1	2	2	1	0
1	33	1	1	1	3	1	1	0	1	2	2	1	0	1	3	1	0	0	0	0	0	3	5	4	5	2	3	5	5	5	5	3	3	4	5	6	5	3	2	3	2	3	3	2	1	5	1	0
1	25	0	0	0	1	0	2	0	0	1	0	0	0	0	0	1	0	0	0	0	0	1	1	1	1	6	5	6	6	6	6	5	6	6	6	6	1	5	1	5	1	4	2	4	1	0	2	0
1	34	1	1	2	3	1	1	0	1	1	0	0	0	0	0	0	0	0	0	0	0	3	5	5	5	4	2	4	6	5	5	5	5	4	5	6	5	3	2	2	3	3	2	2	2	3	2	0
1	30	1	1	2	3	0	1	0	0	1	0	0	0	0	0	0	0	0	0	0	0	2	6	6	6	6	3	5	6	5	5	5	5	5	3	4	3	3	3	3	3	3	2	2	2	6	2	0
1	32	1	1	1	3	0	1	0	0	1	0	0	0	0	3	0	0	0	0	0	0	5	6	6	4	6	4	5	6	5	5	4	6	5	6	6	4	2	2	2	2	2	5	3	2	6	2	0
1	22	1	0	0	1	0	1	1	1	2	0	0	1	0	3	0	0	0	0	0	0	6	6	6	6	6	6	6	6	6	6	6	6	6	6	6	7	1	1	6	1	2	2	2	2	6	2	0
1	24	1	0	0	1	0	1	0	0	1	0	0	0	0	0	0	0	0	0	0	0	6	6	6	6	6	6	6	6	6	6	6	6	6	6	6	4	2	2	4	3	4	4	1	1	0	2	0
1	31	1	1	1	2	1	1	0	0	1	0	0	0	0	0	0	0	0	0	0	0	6	6	6	6	3	3	6	6	6	6	3	4	4	6	3	4	3	2	4	1	4	3	2	2	8	2	0
1	29	1	1	1	2	0	1	1	1	1	0	0	0	0	1	1	0	0	0	0	0	3	6	6	6	4	3	6	6	6	6	6	6	6	6	6	6	4	2	3	2	2	2	2	2	1	2	0
1	33	1	1	1	3	0	2	1	1	2	1	0	0	1	3	1	1	0	0	0	0	6	5	5	6	6	3	5	6	6	6	6	6	6	6	5	6	4	1	4	1	2	3	2	2	6	2	0
1	30	0	1	2	3	0	1	0	0	1	0	0	0	0	3	0	0	0	0	0	0	6	6	6	3	6	3	3	1	4	6	3	3	4	4	3	3	4	3	3	2	2	2	3	3	0	1	0
1	25	0	0	0	1	0	1	0	0	1	0	0	0	0	0	0	0	0	0	0	0	5	5	5	6	3	5	6	6	5	6	3	6	6	6	3	4	5	3	3	3	2	3	2	1	0	2	0
1	37	1	1	0	3	1	1	1	0	1	0	0	0	0	0	0	0	0	0	0	0	3	5	5	2	3	3	3	6	4	4	3	5	3	3	3	2	3	4	3	3	3	3	3	2	2	1	0
1	39	1	1	2	4	1	1	0	0	1	1	0	0	0	0	0	0	0	0	0	0	5	6	6	6	4	2	5	6	3	5	4	5	5	5	3	5	4	5	5	1	1	1	2	2	5	2	0
1	28	1	0	0	2	0	1	0	1	2	1	1	1	1	1	1	1	0	0	0	0	5	5	6	5	6	4	6	5	5	5	5	5	5	5	4	6	3	3	3	3	3	1	2	2	0	2	0
1	34	0	1	2	3	1	1	0	1	2	1	0	0	0	1	1	0	0	0	0	0	4	4	4	5	4	4	6	6	6	6	6	6	5	5	5	4	2	2	4	4	2	4	2	2	5	2	0
1	34	1	1	2	3	1	1	1	1	1	0	0	0	1	0	1	0	0	0	0	0	5	5	5	5	5	6	5	6	6	6	6	5	5	5	5	6	2	2	6	2	2	2	2	2	5	2	0
1	26	1	0	0	2	0	1	1	1	2	1	0	0	1	3	1	0	0	0	0	0	4	6	6	6	4	5	5	6	5	6	6	6	6	6	6	4	4	4	4	2	2	2	2	2	0	2	0
1	34	1	1	2	3	1	1	0	0	1	0	0	1	0	0	0	0	0	0	0	0	3	6	6	6	4	3	3	6	6	6	6	6	5	5	3	5	4	3	3	2	2	2	2	3	3	2	0
1	27	1	0	0	2	0	1	1	0	1	0	0	0	0	0	0	0	0	0	0	0	6	6	5	5	5	4	5	6	6	5	5	5	5	5	5	5	2	3	3	2	2	3	3	3	0	2	0
1	40	0	1	1	4	1	1	1	1	2	2	1	1	0	3	2	0	0	0	0	0	3	6	6	2	4	3	3	6	6	6	6	5	5	6	5	2	3	2	3	3	3	3	3	4	1	2	0
1	35	1	1	1	3	1	1	0	0	1	0	0	0	0	0	0	0	0	0	0	0	6	6	6	6	6	3	6	6	5	6	3	3	3	3	3	5	4	4	4	2	3	2	2	1	6	2	0
1	30	1	0	0	2	0	1	1	0	1	0	0	0	0	0	1	0	0	0	0	0	6	6	6	5	5	5	6	6	5	6	3	5	5	5	5	3	4	3	5	2	5	2	2	1	1	2	0
1	30	1	1	0	2	0	1	0	0	3	1	0	0	1	3	0	0	0	0	0	0	6	6	5	6	5	5	6	6	6	6	5	6	6	6	5	5	6	6	5	1	1	1	1	1	0	2	0
1	38	1	2	0	3	0	0	1	2	3	2	1	0	2	3	2	0	0	0	0	0	6	6	6	6	6	2	6	6	6	6	6	6	6	6	6	6	4	4	3	3	2	2	2	1	0	2	0
1	31	1	1	1	2	1	1	0	1	2	0	0	0	1	1	1	0	0	0	0	0	6	6	6	6	6	5	6	6	6	6	6	6	6	6	6	5	2	3	5	3	3	3	2	1	2	2	0
1	39	1	1	2	3	2	1	1	1	2	0	0	0	0	0	0	0	0	0	0	0	5	6	6	3	2	5	5	6	5	6	5	3	5	5	3	3	2	3	3	3	4	3	4	2	2	2	0
1	43	1	1	2	4	2	1	1	2	4	3	3	0	0	3	3	2	0	0	0	0	6	6	4	6	6	2	6	6	6	6	3	3	5	4	3	4	1	2	5	4	4	3	2	2	5	2	0
1	39	1	1	2	3	1	1	0	2	2	1	2	2	1	1	2	0	0	0	0	0	3	6	5	6	6	4	6	6	6	6	6	3	3	5	6	5	4	3	5	2	2	2	2	2	0	2	0
1	25	1	0	0	0	0	1	1	1	1	0	1	0	0	1	0	0	0	0	0	0	4	5	6	6	5	5	5	5	5	5	5	5	5	5	6	6	4	2	2	2	2	5	2	2	6	2	0
1	28	0	0	0	2	0	1	1	0	1	0	0	0	0	0	0	0	0	0	0	0	6	6	6	6	3	3	6	6	6	6	6	3	3	6	6	4	4	2	4	5	2	2	2	2	8	2	0
1	42	1	1	1	4	1	0	0	0	1	0	1	0	0	0	0	0	0	0	0	0	5	6	6	6	6	3	6	6	5	6	6	3	6	6	3	6	1	1	6	5	2	2	2	2	5	2	0
1	35	1	1	1	3	1	1	0	0	1	0	0	0	0	0	0	0	0	0	0	0	6	6	6	6	5	5	6	6	6	6	6	6	6	6	6	6	5	3	3	2	2	2	2	2	3	2	0
1	25	1	0	0	1	0	1	1	0	2	1	0	1	0	2	0	0	0	0	0	0	3	5	3	2	5	3	5	5	3	3	3	3	3	3	3	3	3	3	3	3	3	3	3	3	1	1	0
1	28	1	0	0	2	0	1	0	1	2	1	1	1	1	1	1	0	0	0	0	0	5	5	5	5	5	5	5	5	5	5	5	5	5	5	5	3	3	3	3	3	3	3	3	3	0	2	0
1	22	0	0	0	1	0	1	0	0	1	0	0	0	0	0	0	0	0	0	0	0	5	6	6	6	5	5	6	6	6	5	6	6	4	6	4	1	1	1	3	4	4	5	5	3	8	2	0
1	31	1	1	1	2	1	1	1	1	1	0	1	1	1	3	1	0	0	0	0	0	6	6	6	6	6	6	6	6	6	6	6	6	6	6	6	5	1	1	5	3	3	3	3	3	5	2	0
1	38	1	0	0	3	1	1	1	0	2	0	1	0	0	1	0	0	0	0	0	0	4	5	6	5	4	2	5	6	5	5	4	5	5	5	5	6	2	2	3	3	5	3	2	2	8	2	0
1	34	1	1	1	3	1	1	0	1	1	0	1	0	1	3	1	0	0	0	0	0	5	6	5	5	6	3	3	6	5	5	6	6	5	6	2	4	2	6	6	2	2	2	2	2	0	2	0
1	24	1	0	0	0	0	1	1	0	1	0	0	0	0	0	0	0	0	0	0	0	6	6	6	6	3	2	3	6	6	6	6	6	5	5	6	2	2	1	5	4	3	5	4	2	0	2	0
1	26	0	0	0	2	0	1	1	0	1	0	0	0	1	0	1	0	0	0	0	0	6	6	6	6	6	4	6	6	6	6	3	6	6	3	6	7	4	1	5	3	2	2	2	2	5	2	0
1	35	1	1	1	3	1	1	1	3	2	1	1	1	1	0	2	1	0	0	0	0	6	6	2	2	3	3	2	2	3	3	3	3	2	3	3	3	4	3	3	3	3	3	3	3	5	1	0
1	35	1	1	2	3	1	1	0	1	2	0	0	0	0	1	0	0	0	0	0	0	5	6	4	5	5	5	5	2	5	5	5	5	5	5	5	5	3	2	3	3	3	3	3	3	5	2	0
1	36	1	1	1	3	1	1	0	0	1	0	0	0	0	3	0	0	0	0	0	0	5	5	6	5	4	4	5	6	5	5	5	5	5	5	5	5	1	1	3	3	4	4	4	3	5	2	0
1	36	1	1	1	3	1	1	0	0	2	0	0	0	0	3	0	0	0	0	0	0	3	6	6	6	5	3	5	6	3	5	6	6	3	3	2	4	3	4	5	2	2	2	2	4	4	2	0
1	36	1	1	2	3	1	1	1	0	1	0	0	0	1	2	1	0	0	0	0	0	6	5	5	5	5	5	5	5	5	5	5	5	5	5	5	6	1	1	1	3	4	4	4	4	0	2	0
1	28	1	0	0	2	0	1	1	1	3	1	0	0	1	0	0	0	0	0	0	0	3	4	3	3	4	6	6	6	5	6	3	3	3	6	5	5	5	2	3	3	3	2	5	1	2	2	0
1	46	1	1	1	4	1	1	0	0	1	0	0	0	0	1	1	0	0	0	0	0	6	3	6	6	6	3	4	6	6	6	5	6	6	6	3	6	4	2	4	5	2	2	3	1	3	2	0
1	28	1	1	2	2	0	2	1	0	1	0	0	0	0	0	1	0	0	0	0	0	5	6	6	6	6	5	6	6	6	6	6	5	5	5	6	7	4	5	4	2	3	2	1	1	5	2	0
1	38	1	1	1	3	1	1	0	2	2	2	1	0	1	3	2	3	0	0	0	0	3	6	5	4	2	5	4	3	5	3	3	3	3	3	3	6	3	4	6	2	2	2	2	2	8	1	0
1	28	1	0	0	2	0	1	0	0	1	0	0	0	0	0	0	0	0	0	0	0	6	4	5	5	4	4	4	6	3	4	3	5	4	4	2	4	5	2	2	2	2	5	5	2	0	1	0
1	39	1	1	2	4	1	0	0	3	4	2	2	0	3	3	3	1	0	0	0	0	6	6	6	1	1	3	6	6	6	6	3	4	6	3	3	7	5	3	2	4	2	2	2	2	6	2	0
1	21	0	0	0	0	0	1	1	1	1	0	1	1	1	1	1	0	0	0	0	0	6	6	6	6	5	5	6	6	5	6	6	6	6	6	6	4	4	5	4	3	3	2	2	2	0	2	0
1	35	1	1	2	3	1	0	0	0	1	0	0	0	0	0	0	0	0	0	0	0	2	4	3	3	3	3	4	6	4	3	5	3	2	3	3	3	4	4	3	3	3	3	3	3	0	1	0
1	38	1	2	1	3	1	1	1	2	1	0	1	1	0	0	0	1	0	0	0	0	3	6	6	3	5	2	2	6	4	3	3	3	3	3	2	1	1	5	5	5	5	3	1	3	2	1	0
1	31	1	1	1	3	1	1	0	0	2	1	0	0	1	3	0	0	0	0	0	0	3	6	6	3	2	2	6	6	6	3	3	3	6	5	3	3	1	1	5	4	3	5	3	4	0	1	0
1	32	1	1	2	3	1	1	0	0	1	0	0	0	0	3	0	0	0	0	0	0	6	6	6	6	6	6	6	6	6	6	4	3	3	4	5	3	1	1	4	4	4	4	4	4	6	2	0
1	27	1	0	0	2	0	1	0	0	1	0	0	0	0	0	0	0	0	0	0	0	4	4	4	4	4	4	4	4	4	4	4	4	4	4	4	1	1	1	1	5	5	5	5	5	8	1	0
1	32	1	1	2	3	1	1	0	0	1	0	0	0	0	0	0	0	0	0	0	0	5	6	6	6	6	3	6	6	6	6	6	6	6	6	6	6	2	1	4	4	4	4	4	1	0	2	0
1	31	1	1	2	3	1	0	1	2	2	0	0	0	0	0	2	0	0	0	0	0	5	5	5	4	2	3	4	6	4	5	3	3	5	3	5	4	2	2	4	4	4	4	4	2	0	1	0
1	27	0	0	0	1	0	1	1	1	2	0	0	0	1	0	0	0	0	0	0	0	3	6	6	5	4	2	6	6	5	5	6	1	6	6	5	6	4	2	5	4	3	2	2	2	8	2	0
1	35	1	1	2	3	1	1	0	0	2	0	0	0	0	0	0	0	0	0	0	0	5	6	5	5	5	4	6	4	5	5	4	5	5	5	4	5	3	3	6	2	3	3	3	2	0	2	0
1	25	1	0	0	0	0	1	0	0	1	0	0	0	0	0	0	0	0	0	0	0	5	6	6	6	6	5	6	6	6	6	5	3	6	6	6	4	2	2	5	2	5	3	5	2	8	2	0
1	32	1	1	1	3	1	1	0	1	1	0	0	0	0	1	0	0	0	0	0	0	6	6	6	6	6	6	6	6	4	6	6	6	6	6	6	5	5	3	4	2	3	4	2	2	0	2	0
1	32	0	1	2	3	0	1	0	0	4	2	0	0	0	3	0	0	0	0	0	0	3	4	6	3	3	5	6	6	4	5	3	3	4	5	6	3	1	2	4	4	3	5	5	3	8	2	0
1	31	1	1	1	3	1	1	1	0	1	0	0	0	0	0	1	0	0	0	0	0	3	6	5	5	5	2	4	6	5	5	4	5	4	4	4	5	5	2	3	3	3	3	3	3	1	2	0
1	35	1	1	2	3	1	1	0	0	1	0	0	0	0	0	0	0	0	0	0	0	3	3	6	5	6	3	3	5	6	6	3	5	5	6	3	6	5	3	3	2	2	3	3	3	0	2	0
1	23	0	0	0	0	0	1	1	1	1	1	0	0	0	2	1	0	0	0	0	0	6	6	6	6	3	3	3	6	6	3	3	3	3	6	6	5	1	3	5	4	3	3	3	3	2	2	0
1	30	1	1	1	2	1	1	0	0	2	0	1	0	0	0	0	0	0	0	0	0	5	6	6	6	5	3	6	6	6	5	3	3	5	5	5	3	4	4	4	3	3	3	3	3	0	2	0
1	33	1	1	1	3	1	1	0	0	1	0	0	0	0	3	0	0	0	0	0	0	6	6	6	4	4	3	5	6	5	6	6	5	5	5	5	5	4	3	4	2	2	4	3	3	5	2	0
1	25	0	1	0	1	0	1	0	1	1	1	0	0	0	0	0	0	0	0	0	0	3	5	5	4	4	4	4	5	4	4	5	4	4	4	5	3	4	3	3	3	4	3	3	4	4	1	0
1	41	1	1	1	4	2	0	0	1	2	1	1	0	1	1	1	0	0	0	0	0	6	6	6	1	2	5	6	6	6	6	3	3	6	5	2	2	1	2	5	2	5	5	4	4	0	2	0
1	25	1	0	0	1	0	1	0	0	1	0	0	0	0	0	0	0	0	0	0	0	6	6	6	5	5	4	3	6	6	6	5	5	3	4	4	4	4	2	4	3	3	3	3	4	8	2	0
1	34	1	1	2	3	0	1	1	2	1	3	1	1	0	3	2	0	0	0	0	0	6	6	6	6	5	3	6	6	6	6	6	3	3	6	3	5	1	3	5	4	5	5	2	1	0	2	0
1	38	1	1	2	3	1	1	1	1	1	0	1	0	0	0	1	0	0	0	0	0	4	6	5	2	6	5	2	6	5	6	5	2	3	4	5	1	2	2	6	5	5	5	3	2	0	2	0
1	32	1	1	2	3	1	1	1	2	1	1	0	0	0	2	1	0	0	0	0	0	6	3	5	2	3	3	5	6	5	5	6	6	6	6	5	7	2	2	6	2	2	6	2	2	6	2	0
0	25	0	1	1	1	0	1	0	0	1	0	0	0	0	0	0	0	0	0	0	0	3	3	6	6	6	6	5	6	4	6	3	6	6	6	3	6	4	3	5	2	2	5	2	2	0	2	0
1	33	1	1	1	3	1	1	0	0	1	0	0	0	0	0	0	0	0	0	0	0	6	6	6	6	6	5	5	6	5	6	6	3	5	3	3	5	3	2	5	2	5	2	5	2	8	2	0
1	28	1	0	0	2	0	1	0	0	1	0	0	0	1	3	0	0	0	0	0	0	6	6	6	6	5	5	6	6	5	6	5	5	5	5	5	5	2	2	5	4	4	5	2	2	0	2	0
1	35	1	1	1	3	1	0	1	2	2	1	2	2	1	3	2	2	0	0	0	0	2	3	3	3	2	3	3	3	3	3	5	3	3	3	5	3	3	3	4	4	4	4	3	3	8	1	0
1	41	1	1	1	4	2	1	0	1	1	0	1	0	0	1	1	0	0	0	0	0	3	3	4	6	3	3	3	6	3	3	3	3	2	3	3	4	5	2	5	3	3	3	3	3	8	1	0
1	31	1	1	1	3	1	1	1	1	3	3	1	1	2	3	0	0	0	0	0	0	3	5	3	2	2	2	3	6	5	5	3	3	3	3	5	6	3	2	4	2	2	5	4	3	0	1	0
1	33	1	1	1	3	1	1	0	1	2	1	0	0	0	0	1	0	0	0	0	0	3	6	6	6	6	3	3	6	4	4	3	3	3	3	3	4	4	4	4	3	3	3	3	3	5	1	0
1	28	1	1	1	2	0	1	1	1	2	1	0	0	2	2	0	0	0	0	0	0	5	6	6	6	5	5	5	6	5	5	5	3	3	3	3	6	3	2	5	2	3	4	3	3	3	2	0
1	34	1	1	2	3	1	1	0	1	1	1	0	0	0	2	0	0	0	0	0	0	6	6	6	6	4	4	5	6	3	6	6	5	5	3	3	5	4	3	4	3	3	3	3	3	5	2	0
1	27	0	0	0	2	0	1	1	1	2	1	0	0	1	1	0	0	0	0	0	0	5	6	5	5	5	4	5	6	5	5	6	5	5	5	5	6	4	3	3	3	3	3	3	3	6	2	0
1	28	1	1	1	2	0	1	0	1	1	0	0	0	0	3	1	0	0	0	0	0	3	1	6	5	1	6	6	6	6	6	2	3	1	4	6	2	2	2	6	3	6	4	2	4	0	1	0
1	22	0	0	0	0	0	1	0	0	1	0	0	0	0	0	0	0	0	0	0	0	5	4	6	6	5	3	5	5	3	5	3	3	2	3	4	5	3	2	4	4	4	3	2	4	0	1	0
1	28	1	1	0	2	0	1	1	0	1	0	0	1	0	0	1	0	0	0	0	0	4	6	6	6	4	4	6	6	6	6	6	6	6	6	6	6	2	2	6	2	3	2	4	4	5	2	0
1	33	1	1	1	3	1	1	1	0	1	0	0	0	0	0	0	0	0	0	0	0	4	5	6	5	6	3	5	6	5	6	6	5	4	5	5	7	5	2	2	3	3	2	2	5	5	2	0
1	27	1	0	0	2	0	2	1	3	3	2	2	1	2	3	3	2	0	0	0	0	3	3	4	4	4	3	4	6	4	4	4	4	3	3	2	5	1	2	6	4	4	4	4	2	5	1	0
1	29	1	1	1	3	1	1	1	0	1	0	0	1	0	2	2	0	0	0	0	0	6	6	6	6	6	5	6	6	6	6	6	6	6	6	6	2	2	2	6	2	6	6	4	2	5	2	0
0	32	1	1	0	2	0	1	1	1	2	2	0	0	1	3	1	0	0	0	0	0	3	5	6	6	4	3	6	6	4	3	3	3	4	4	6	5	2	4	5	2	5	3	3	3	6	2	0
1	31	1	1	1	3	1	1	0	0	1	0	0	0	0	0	0	0	0	0	0	0	4	6	4	5	5	4	5	6	5	5	4	4	4	4	4	4	5	3	3	4	4	3	3	3	0	2	0
1	33	1	1	1	2	1	1	0	2	2	0	1	0	1	1	1	0	0	0	0	0	6	6	5	6	5	5	5	6	5	5	3	5	5	5	3	6	4	5	6	2	3	2	1	3	0	2	0
1	24	1	0	0	0	0	1	1	1	1	0	0	0	0	0	0	0	0	0	0	0	6	6	6	6	6	6	6	6	6	6	6	6	6	6	6	2	2	2	6	2	5	5	5	3	0	2	0
1	26	1	0	0	2	0	0	0	0	2	0	1	0	0	0	1	0	0	0	0	0	4	4	4	4	2	3	5	5	5	5	4	3	4	4	4	4	3	3	3	3	3	4	5	4	0	1	0
1	36	1	1	2	3	1	1	0	2	1	0	1	0	0	0	1	0	0	0	0	0	3	5	5	4	5	5	4	6	4	4	5	5	5	5	4	2	2	5	4	4	3	4	4	4	0	2	0
1	38	0	1	1	4	1	1	1	1	1	0	0	0	0	1	0	0	0	0	0	0	3	3	6	6	6	6	6	6	3	3	3	6	6	6	6	6	2	2	4	2	2	4	6	4	3	2	0
1	23	0	0	0	1	0	1	0	0	1	0	0	0	0	0	0	0	0	0	0	0	6	6	6	6	5	5	5	6	6	6	6	6	6	6	6	3	3	3	3	4	4	4	4	4	0	2	0
1	41	0	1	1	4	1	0	0	0	1	0	0	0	0	3	1	0	0	0	0	0	3	5	5	5	2	3	3	6	3	5	3	3	4	4	2	5	3	2	5	4	2	2	4	5	5	1	0
1	43	0	1	2	4	1	1	0	0	1	0	0	0	0	0	0	0	0	0	0	0	5	6	6	6	6	5	6	6	6	6	5	5	5	6	6	3	2	2	4	4	5	4	3	5	0	2	0
1	31	1	1	2	3	1	2	0	0	2	1	0	0	0	2	0	0	0	0	0	0	6	6	6	5	6	6	6	6	5	6	6	6	5	6	6	6	1	1	4	1	4	4	4	7	2	2	0
1	32	1	1	1	3	1	1	0	0	1	0	1	0	0	1	0	0	0	0	0	0	3	3	4	4	3	4	3	6	3	3	3	3	3	3	3	3	4	3	4	5	5	4	3	2	0	1	0
0	27	0	0	0	1	0	1	0	0	1	0	0	0	0	3	0	0	0	0	0	0	6	6	6	6	3	2	6	1	2	6	6	3	5	2	3	4	2	6	6	4	2	5	2	2	0	1	0
1	25	1	0	0	1	0	1	1	0	2	1	0	0	1	3	0	0	0	0	0	0	5	3	6	5	3	2	6	6	6	6	2	3	2	5	6	4	4	5	5	5	2	2	4	2	6	2	0
1	25	1	1	0	1	0	1	0	1	2	0	0	0	1	0	0	1	0	0	0	0	5	6	6	6	4	3	6	6	6	4	5	5	5	6	3	6	4	4	4	2	3	4	4	2	0	2	0
1	40	1	1	1	3	1	1	0	0	3	2	0	0	1	3	1	1	0	0	0	0	5	6	6	2	2	5	5	6	6	4	5	4	2	5	3	4	3	3	5	2	4	4	5	3	0	2	0
1	26	0	0	0	1	0	1	1	2	2	2	1	1	2	3	2	2	3	0	0	0	3	4	3	3	1	2	1	5	3	3	3	3	4	3	3	4	2	2	3	4	5	5	4	4	0	1	0
1	40	1	1	2	4	2	1	1	3	4	3	2	0	3	3	2	2	0	0	0	0	5	5	3	5	3	3	3	6	3	6	4	3	3	3	2	4	2	3	4	4	4	4	4	4	6	1	0
1	34	1	1	2	3	1	2	0	0	1	0	0	0	0	0	0	0	0	0	0	0	3	5	5	5	5	3	3	6	3	3	3	3	5	3	3	5	2	5	5	2	2	4	4	4	5	1	0
1	46	1	1	1	4	2	0	0	2	3	2	1	1	1	2	2	0	0	1	0	0	5	6	6	5	5	3	3	6	5	3	3	3	4	3	2	3	2	3	5	4	4	4	4	4	5	1	0
1	26	1	0	0	1	0	1	0	0	1	0	0	0	0	0	0	0	0	0	0	0	5	5	6	6	5	3	6	6	5	6	3	5	4	3	6	6	3	4	6	2	3	2	3	4	0	2	0
0	32	0	0	0	3	0	2	0	0	1	0	0	0	0	0	0	0	0	0	0	0	5	6	6	6	6	6	6	6	6	6	6	6	5	5	5	3	4	3	4	3	4	4	4	4	0	2	0
1	27	1	0	0	2	0	1	0	0	1	0	0	0	0	1	0	0	0	0	0	0	6	6	6	6	6	6	6	6	6	6	6	6	6	6	6	4	2	2	5	1	5	5	5	4	6	2	0
1	26	1	0	0	2	0	1	1	2	2	1	1	0	1	1	2	1	0	0	0	0	4	6	5	3	3	3	3	6	5	3	2	3	4	6	6	4	5	2	5	3	5	5	4	1	6	1	0
1	26	1	0	0	1	0	1	1	0	2	1	0	0	0	3	0	0	0	0	0	0	6	6	6	6	4	4	5	6	6	5	6	6	6	5	4	6	4	2	4	5	4	4	4	1	0	2	0
1	34	1	1	1	3	1	0	1	1	1	0	0	0	0	0	1	0	0	0	0	0	5	6	4	6	5	3	6	6	6	3	3	3	3	3	5	4	1	5	5	5	5	5	2	2	0	2	0
1	28	1	0	0	2	0	1	0	0	1	0	1	0	0	0	0	0	0	0	0	0	6	6	6	6	6	4	6	6	6	6	3	4	3	6	6	4	4	4	4	4	4	3	5	2	0	2	0
1	22	0	0	0	0	0	0	0	0	2	1	1	0	1	0	0	0	0	0	0	0	3	3	3	3	3	3	3	3	3	3	6	3	3	3	3	7	2	3	5	3	3	5	3	3	5	1	0
1	23	0	1	0	1	0	0	1	1	2	0	1	1	1	2	1	0	0	0	0	0	3	3	4	6	4	3	6	6	6	5	5	5	4	6	2	4	4	4	4	4	4	4	3	3	6	2	0
1	40	1	1	2	4	1	1	0	1	1	1	1	0	0	3	1	0	0	0	0	0	4	6	6	6	3	3	3	6	6	6	3	6	3	3	6	2	1	5	5	5	5	5	3	3	0	2	0
1	39	1	1	1	4	2	1	0	1	1	0	0	0	0	0	0	0	0	0	0	0	6	6	6	6	6	3	6	6	6	6	3	6	3	6	3	4	4	3	4	4	4	4	4	3	5	2	0
1	27	1	0	0	2	0	1	1	2	3	2	1	1	0	3	3	0	0	0	0	0	4	4	4	3	3	4	4	6	4	3	4	4	3	4	3	4	2	4	4	4	4	4	4	4	0	1	0
1	32	1	1	1	3	1	1	1	2	3	2	1	1	2	3	1	0	0	0	0	0	4	5	6	3	4	3	3	6	5	6	6	5	3	4	6	5	2	3	4	4	4	4	4	4	6	2	0
1	27	1	1	0	2	0	1	1	0	1	0	0	0	0	0	0	0	0	0	0	0	6	6	6	6	6	2	6	6	6	6	2	3	3	3	3	4	3	3	3	4	4	4	5	4	6	2	0
1	33	1	1	1	3	0	1	0	1	1	0	0	0	0	1	0	0	0	0	0	0	6	6	6	6	4	3	6	6	6	6	6	3	6	3	3	4	2	2	5	4	5	4	4	4	0	2	0
1	28	1	1	1	2	0	1	1	1	3	2	2	2	2	3	2	1	1	0	0	0	5	5	6	6	6	4	5	5	5	5	6	5	5	6	4	5	2	3	3	5	4	4	4	4	0	2	0
1	23	1	0	0	1	0	1	1	0	1	0	1	0	0	2	1	0	0	0	0	0	6	6	6	6	6	3	6	6	6	6	3	3	6	6	6	3	2	5	4	4	4	4	4	4	5	2	0
1	27	1	0	0	2	0	1	0	0	1	0	0	0	0	0	0	0	0	0	0	0	6	6	6	6	6	6	6	6	6	6	6	6	3	3	6	6	2	4	3	5	2	4	4	4	8	2	0
1	31	1	1	2	3	1	0	1	0	1	0	0	0	0	3	0	0	0	0	0	0	6	6	6	6	6	6	6	6	6	6	6	6	6	6	6	4	5	4	4	4	3	2	4	4	0	2	0
1	35	0	0	0	3	1	1	0	0	1	0	0	0	0	1	1	0	0	0	0	0	3	5	5	3	3	2	3	4	4	3	3	3	5	3	3	3	4	3	4	3	3	5	4	5	0	1	0
1	29	0	1	1	3	0	0	0	1	2	1	1	1	1	3	1	0	0	0	0	0	3	4	6	6	2	3	6	6	6	6	4	3	3	3	3	6	5	4	4	4	4	4	3	1	0	1	0
1	24	0	0	0	1	0	1	0	0	1	0	0	0	0	3	0	0	0	0	0	0	6	3	6	5	5	1	5	6	6	5	5	5	5	5	1	4	6	7	4	4	4	1	4	1	5	2	0
1	32	1	1	1	3	1	1	0	1	3	2	0	0	1	3	1	0	0	0	0	0	5	6	5	6	6	5	6	6	6	6	6	6	4	5	6	5	1	4	6	5	5	4	4	1	2	2	0
1	29	1	0	0	2	1	1	1	0	1	0	0	0	0	0	1	0	0	0	0	0	6	6	6	6	6	4	6	6	6	6	6	6	6	6	6	5	3	4	5	4	4	4	4	2	0	2	0
1	33	1	1	2	3	1	1	0	0	1	0	0	0	0	0	1	1	0	0	0	0	6	6	6	6	3	5	4	6	3	4	5	5	5	4	4	5	3	2	5	4	5	4	4	3	3	2	0
1	38	1	1	2	3	1	1	0	1	1	0	0	0	0	0	1	1	0	0	0	0	5	5	5	6	5	4	6	5	5	6	4	5	5	5	4	5	2	3	5	3	5	5	4	3	5	2	0
1	33	1	1	2	3	1	1	0	1	2	1	0	0	1	3	0	0	0	0	0	0	5	6	6	5	2	5	6	6	5	6	6	6	5	4	3	4	2	3	5	5	4	5	4	3	8	2	0
1	31	1	1	2	2	0	2	0	0	1	0	0	0	0	0	0	0	0	0	0	0	6	6	6	5	6	3	6	6	3	6	6	6	6	6	6	6	6	1	5	3	5	3	3	3	8	2	0
1	21	0	0	0	0	0	1	1	0	1	0	0	0	0	1	0	0	0	1	0	0	3	5	5	5	5	5	5	5	3	3	2	3	3	3	5	4	4	3	4	4	4	4	4	4	0	1	0
1	31	1	1	1	3	1	1	0	1	2	1	1	0	1	3	1	0	0	0	0	0	3	5	3	3	3	2	4	6	5	6	5	4	3	4	5	5	3	5	5	4	3	2	4	4	0	1	0
1	25	0	0	0	1	0	1	1	0	1	0	0	0	0	0	0	0	0	0	0	0	3	6	6	4	6	3	3	5	5	5	3	4	4	4	3	6	2	5	2	3	5	5	3	4	3	1	0
1	31	0	1	1	2	0	1	1	1	1	1	0	0	0	3	0	0	0	0	0	0	6	4	4	5	4	4	6	6	4	6	5	6	3	6	4	3	2	1	6	6	4	5	4	4	0	2	0
1	43	1	1	2	4	1	1	1	2	2	2	1	0	1	3	2	0	0	0	0	0	6	6	4	5	6	3	3	6	3	6	5	5	5	5	6	3	4	2	5	3	5	6	3	4	0	2	0
1	36	1	0	0	3	1	1	1	1	1	0	0	0	0	3	1	0	0	0	0	0	6	6	6	6	3	3	6	6	6	6	3	6	6	3	3	6	4	1	6	2	2	6	4	4	0	2	0
1	24	0	0	0	0	0	1	0	0	1	0	0	0	0	0	0	0	0	0	0	0	6	6	6	6	6	3	6	6	6	6	6	6	6	6	6	4	5	2	4	4	4	4	4	4	6	2	0
1	22	0	0	0	0	0	1	1	0	1	0	0	0	0	0	0	0	0	0	0	0	5	6	6	6	6	6	6	6	6	6	6	6	6	6	6	4	4	3	4	4	4	4	4	4	0	2	0
1	24	0	0	0	0	0	1	1	0	1	1	1	0	0	1	1	0	0	0	0	0	6	6	4	6	4	2	6	1	3	3	3	2	6	5	2	3	3	2	5	4	5	5	3	5	0	1	0
1	35	1	1	1	3	1	1	1	1	1	1	0	0	1	1	0	0	0	0	0	0	3	3	5	3	2	3	6	6	6	6	3	3	6	6	5	2	2	2	4	5	5	5	5	5	5	2	0
1	30	1	1	1	3	0	1	1	0	2	1	1	0	1	1	1	0	0	0	0	0	5	6	6	6	6	6	6	6	6	6	6	6	3	6	3	7	3	3	3	2	2	5	5	5	5	2	0
1	32	1	0	0	2	0	1	1	0	1	0	0	0	0	0	0	0	0	0	0	0	3	3	6	6	2	3	3	6	3	3	2	2	6	3	2	6	5	2	6	6	2	5	2	2	0	1	1
1	30	1	0	0	2	0	1	1	1	2	2	1	1	2	2	1	0	0	0	0	0	5	6	6	6	6	1	5	6	6	5	5	4	6	5	5	6	5	5	6	4	3	3	2	2	1	2	1
1	29	1	0	0	3	1	1	1	1	2	1	1	0	0	2	1	0	0	0	0	0	3	4	2	3	4	3	3	5	3	3	2	2	2	3	5	2	3	4	5	5	5	5	4	3	0	1	1
1	26	1	0	0	2	0	1	0	0	2	0	0	0	1	3	0	1	0	0	0	0	5	5	5	6	5	3	5	6	6	5	4	4	6	5	5	6	3	4	3	3	4	5	5	3	3	2	1
1	31	1	1	1	3	1	0	0	0	1	0	0	0	0	3	0	0	0	0	0	0	3	6	6	6	5	6	6	6	6	6	6	6	6	6	6	7	6	4	3	4	3	3	3	3	0	2	1
0	24	1	1	1	1	0	1	1	0	3	2	0	0	1	3	3	0	0	0	0	0	3	3	3	3	3	3	3	3	3	3	3	3	3	3	3	5	3	4	4	4	4	4	4	4	0	1	1
0	38	1	1	2	3	1	1	1	1	1	0	0	0	0	0	1	1	0	0	0	0	3	3	3	3	3	3	3	3	3	3	3	3	3	3	3	4	4	4	4	4	4	4	4	4	0	1	1
1	33	1	1	2	3	1	1	0	0	1	0	0	0	0	2	0	0	0	0	0	0	2	5	5	5	3	2	2	1	3	3	3	3	3	3	3	4	4	4	4	4	4	4	4	4	5	1	1
1	40	2	1	1	3	2	2	0	1	2	1	1	1	1	1	1	1	1	1	1	1	5	3	3	3	3	3	3	3	3	3	3	3	3	3	3	4	4	4	4	4	4	4	4	4	0	1	1
1	31	0	1	2	3	0	1	0	1	2	1	1	1	1	1	1	0	0	0	0	0	3	4	3	3	4	4	3	2	3	3	3	3	3	3	3	4	4	4	4	4	4	4	4	4	9	1	1
1	25	1	0	0	1	0	0	0	1	1	1	0	0	1	1	1	0	0	0	0	0	3	3	4	3	3	3	3	6	3	3	3	3	3	3	3	4	4	4	4	4	4	4	4	4	0	1	1
1	28	1	0	0	1	0	1	1	0	2	1	0	0	1	2	0	0	0	0	0	0	3	3	3	3	3	5	6	6	3	4	3	3	2	2	3	4	4	4	4	4	4	4	4	4	8	1	1
1	22	0	0	0	1	0	1	0	0	1	0	0	0	0	0	0	0	0	0	0	0	3	3	3	3	3	5	5	5	3	5	3	3	3	3	3	4	4	4	4	4	4	4	4	4	0	1	1
1	32	1	1	1	2	0	0	1	1	3	2	1	1	2	3	2	2	0	0	0	0	3	3	6	2	2	5	4	6	4	5	3	3	3	3	3	4	4	4	4	4	4	4	4	4	5	1	1
1	29	1	1	2	3	1	1	1	1	1	0	1	1	1	3	0	0	0	0	0	0	3	5	5	5	4	3	4	6	3	3	3	3	3	3	4	4	4	4	4	4	4	4	4	4	5	1	1
1	35	1	1	2	3	1	1	1	1	1	0	0	0	0	1	1	0	0	0	0	0	3	3	6	3	3	6	3	1	5	3	5	5	5	3	4	3	2	3	5	4	5	5	5	4	2	1	1
0	27	0	0	0	1	0	1	1	1	2	2	0	0	1	2	1	0	0	0	0	0	4	4	4	4	4	4	4	4	4	4	4	4	4	4	4	4	4	4	4	4	4	4	4	4	5	1	1
1	30	1	1	0	2	0	0	0	1	2	0	0	0	0	3	1	1	0	0	0	0	3	3	3	5	3	4	5	6	5	5	4	3	3	4	4	4	3	5	5	4	4	4	3	4	7	1	1
1	31	1	1	2	2	1	1	1	0	2	1	1	0	1	2	0	0	0	0	0	0	5	6	5	3	5	5	5	5	3	3	3	3	3	3	3	4	4	4	4	4	4	4	4	4	0	1	1
1	26	0	0	0	1	0	1	1	0	1	0	2	0	1	0	1	0	0	0	0	0	3	5	5	5	4	4	4	5	5	5	3	3	3	3	5	4	3	3	4	4	4	6	4	4	6	1	1
1	35	1	1	2	3	1	1	0	0	1	0	0	0	0	3	0	0	0	0	0	0	3	6	5	5	5	3	2	6	6	3	3	5	6	3	3	5	5	2	3	2	5	5	5	4	0	1	1
1	26	1	1	0	1	0	0	1	1	1	2	1	0	2	0	2	0	0	0	0	0	6	6	6	4	6	1	6	6	6	2	6	6	6	3	2	4	4	4	4	4	4	4	4	4	0	2	1
1	39	1	1	1	4	1	1	1	0	1	0	0	0	0	1	0	0	0	0	0	0	6	6	6	5	6	4	6	6	6	6	4	3	4	3	3	4	3	1	7	2	7	4	4	4	4	2	1
1	28	1	1	1	2	0	0	0	1	2	1	0	0	0	1	3	0	0	0	0	0	3	6	6	2	4	3	6	6	6	6	6	6	5	6	4	4	1	5	4	6	4	4	4	4	0	2	1
1	34	1	1	2	3	1	1	1	2	1	0	0	0	0	0	1	0	0	0	0	0	3	6	5	3	5	3	3	6	6	6	6	6	6	6	6	4	4	4	4	4	4	4	4	4	8	2	1
0	29	1	0	0	2	0	1	1	1	2	1	0	1	1	1	2	0	0	0	0	0	6	6	6	6	1	3	3	6	6	6	6	6	6	6	6	4	4	4	4	4	4	4	4	4	6	2	1
1	33	1	0	0	2	1	0	1	1	1	0	0	0	0	0	0	0	0	0	0	0	6	6	6	6	5	3	4	6	6	5	6	5	6	6	5	4	4	4	4	4	4	4	4	4	0	2	1
1	30	1	1	1	2	0	1	1	1	1	0	0	0	0	3	1	0	0	0	0	0	6	6	6	6	6	6	6	6	6	6	6	6	6	6	6	4	4	4	4	4	4	4	4	4	0	2	1
1	28	1	0	1	3	0	1	1	1	4	3	0	0	2	3	3	0	0	0	0	0	4	6	6	5	5	5	5	6	6	6	5	3	3	5	2	2	4	4	4	5	4	5	3	5	3	2	1
1	31	1	2	1	3	1	1	1	2	2	0	0	0	1	0	3	0	0	0	0	0	3	6	6	6	2	5	5	6	6	5	5	4	5	5	5	2	5	2	4	5	5	5	3	5	0	2	1
1	29	0	1	1	2	0	1	0	1	2	1	0	1	1	1	1	0	0	0	0	0	6	6	6	6	6	2	4	6	6	6	6	6	1	3	4	4	4	2	2	5	4	5	5	5	0	2	1
1	27	1	0	0	1	0	1	1	0	1	0	0	0	0	0	0	0	0	0	0	0	5	3	6	3	3	5	6	6	6	6	6	6	6	6	2	5	2	2	2	5	5	5	5	5	0	2	1
1	28	1	1	0	2	0	1	1	0	2	1	0	0	1	1	0	0	0	0	0	0	3	6	6	6	6	5	6	6	6	5	3	6	6	6	3	5	4	4	4	1	4	4	5	5	6	2	1
1	39	1	1	2	4	1	2	0	0	1	0	0	0	0	0	0	0	0	0	0	0	3	6	6	2	2	2	3	4	5	3	5	3	3	6	3	4	2	3	6	4	5	6	5	2	0	1	1
1	26	1	0	0	1	0	1	1	1	3	2	1	2	1	3	1	0	0	0	0	0	3	3	6	3	4	6	6	6	6	6	6	3	4	3	6	4	4	4	5	5	5	4	4	2	2	2	1
1	31	1	1	1	3	1	0	1	1	2	1	1	0	1	3	2	0	0	0	0	0	1	3	3	5	2	1	2	5	5	5	3	3	5	3	2	4	2	3	6	5	5	4	5	3	0	1	1
1	29	1	1	1	2	0	0	1	0	1	0	0	0	0	0	2	1	0	0	0	0	4	3	3	3	2	2	4	5	3	5	3	5	5	5	4	6	4	2	6	4	2	5	4	4	3	1	1
1	32	1	0	0	3	1	1	1	2	2	3	2	0	0	3	1	0	0	0	0	0	5	5	3	2	2	5	3	6	5	6	3	4	5	3	2	4	3	4	5	5	4	4	4	4	0	1	1
1	25	1	0	0	1	0	1	1	1	1	0	1	0	1	0	1	1	0	0	0	0	4	3	6	6	3	4	3	5	3	4	6	6	3	3	3	3	5	4	4	4	4	4	5	4	0	1	1
1	37	1	1	1	3	2	1	1	0	2	0	1	0	0	0	0	0	0	0	0	0	3	5	6	1	2	2	5	5	4	5	5	5	5	4	5	5	2	2	5	5	5	5	4	4	5	1	1
1	26	1	0	0	1	0	1	1	0	1	1	1	0	0	0	1	0	0	0	0	0	6	6	6	6	6	4	6	6	6	5	6	6	4	6	4	7	4	3	3	3	3	5	5	4	0	2	1
1	37	1	1	2	3	2	1	0	0	1	0	0	0	0	1	1	0	0	0	0	0	6	6	6	6	6	6	6	6	6	6	5	6	6	5	5	7	2	2	6	2	6	4	4	4	0	2	1
1	28	0	1	1	0	0	2	0	0	1	0	0	0	0	0	0	0	0	0	0	0	6	6	6	6	6	6	6	6	6	6	6	6	6	6	6	7	2	4	4	4	4	4	4	4	8	2	1
1	28	1	1	1	2	0	1	0	1	3	2	1	0	1	3	2	0	0	0	0	0	3	5	3	5	5	3	4	5	3	3	3	3	4	3	3	5	2	4	1	5	5	5	5	5	0	1	1
1	35	1	0	0	3	1	2	1	1	1	2	1	0	1	3	1	1	0	0	0	0	6	6	5	1	1	2	4	5	5	5	4	4	4	4	4	3	2	2	5	5	5	5	5	5	0	1	1
0	24	0	0	0	1	0	1	0	0	1	0	0	0	0	0	0	0	0	0	0	0	3	3	3	4	3	6	6	6	3	4	3	3	3	4	6	4	1	4	6	4	4	4	5	5	6	1	1
1	22	0	0	0	0	0	1	0	0	1	0	0	0	0	0	0	0	0	0	0	0	5	5	5	5	5	5	5	5	5	5	4	4	5	5	4	4	2	2	4	6	4	5	5	5	8	2	1
1	25	1	0	0	2	0	1	0	0	1	0	0	0	0	0	0	0	0	0	0	0	5	5	6	6	4	5	6	6	5	6	6	4	3	3	3	4	3	2	4	5	5	5	4	5	8	2	1
1	34	1	1	2	3	1	1	0	1	2	1	1	0	0	1	1	0	0	0	0	0	3	3	6	3	6	5	5	6	3	5	6	6	5	3	3	1	1	2	6	4	5	6	6	6	0	2	1
1	29	1	0	0	2	0	1	1	0	1	0	0	0	0	3	1	0	0	0	0	0	6	6	6	6	3	5	6	5	3	3	3	3	3	6	5	5	1	4	6	6	6	6	3	1	0	2	1
1	30	1	2	1	2	1	1	1	1	1	0	0	0	0	3	1	0	0	0	0	0	5	6	5	6	6	3	6	6	5	6	6	6	6	6	3	7	4	6	6	4	5	3	2	1	0	2	1
1	24	0	1	1	1	0	1	1	0	1	0	0	0	0	0	0	0	0	0	0	0	3	5	3	5	3	3	5	5	3	3	3	3	2	3	5	6	5	3	4	5	5	4	4	2	0	1	1
1	22	0	0	0	0	0	1	1	1	4	3	2	0	3	3	2	0	0	0	0	0	4	5	6	3	3	2	4	6	5	5	6	6	5	5	3	6	6	4	4	4	4	4	4	2	0	2	1
1	23	0	0	0	0	0	1	0	1	2	1	1	0	0	1	0	0	0	0	0	0	5	6	6	5	6	3	6	6	3	6	5	5	5	6	5	4	3	4	5	5	5	5	5	2	8	2	1
1	28	0	1	1	2	0	0	0	0	1	0	0	0	0	3	0	0	0	0	0	0	6	6	6	6	5	6	6	5	5	5	5	5	5	5	5	5	5	5	5	4	4	4	4	2	0	2	1
1	24	0	0	0	1	0	1	1	0	1	0	0	0	0	0	1	0	0	0	0	0	3	3	3	3	2	4	3	6	3	3	3	2	3	2	6	4	2	4	6	6	4	5	4	3	8	1	1
1	31	1	0	1	2	1	1	1	0	1	1	0	0	0	3	0	0	0	0	0	0	3	5	2	6	1	1	4	5	5	5	5	3	3	3	4	4	4	4	6	5	4	4	4	3	0	1	1
1	24	1	0	0	1	0	1	1	0	1	0	0	0	0	3	0	0	0	0	0	0	6	5	6	6	3	3	6	1	3	3	3	3	3	3	3	5	5	3	5	4	5	4	4	3	2	1	1
1	38	1	1	2	4	2	1	1	2	3	2	2	1	2	2	2	1	0	1	0	0	5	5	3	3	2	2	3	6	5	5	3	3	3	3	3	4	4	4	4	3	5	5	5	4	2	1	1
1	34	1	0	0	3	1	0	1	3	2	1	2	1	2	3	3	0	0	0	0	0	4	3	5	5	4	2	4	5	5	4	3	3	4	3	4	5	4	4	5	4	4	4	4	4	0	1	1
1	35	1	1	2	3	1	0	1	1	3	2	2	2	2	1	3	1	0	0	0	0	5	5	5	2	2	2	2	5	5	5	5	5	5	5	2	5	5	3	4	4	4	5	4	4	5	1	1
1	29	1	1	1	2	1	1	0	1	2	0	0	0	1	2	0	0	0	0	0	0	6	6	6	3	6	2	3	6	5	6	3	3	3	4	2	4	2	5	6	2	5	5	5	4	6	1	1
1	31	1	1	1	3	0	1	1	0	2	1	0	0	1	1	1	0	0	0	0	0	1	3	6	3	5	3	3	6	3	6	5	6	6	6	6	4	6	4	4	4	4	4	4	4	5	2	1
1	32	1	0	0	3	1	1	1	1	1	0	0	0	0	3	0	0	3	0	0	0	3	6	6	4	5	3	4	6	4	6	3	4	6	3	3	4	3	2	4	5	5	5	5	5	0	2	1
1	35	0	1	1	3	1	1	0	0	1	0	0	0	1	1	0	0	0	0	0	0	6	6	6	6	2	2	6	6	4	5	3	5	5	3	3	4	3	4	5	3	5	4	5	5	0	2	1
1	35	1	1	2	3	1	1	1	0	1	0	1	0	0	1	0	0	0	0	0	0	3	5	5	5	5	5	5	6	5	6	5	5	2	5	4	6	5	3	4	4	4	3	4	5	5	2	1
1	32	1	1	2	3	1	1	1	1	2	2	1	1	2	3	1	0	0	0	0	0	6	6	6	6	6	6	6	6	6	6	3	6	6	6	6	1	4	2	6	5	5	5	5	5	0	2	1
1	32	1	1	2	2	0	1	0	1	2	0	0	0	1	3	0	0	0	0	0	0	3	5	5	3	3	3	3	5	6	3	6	3	3	3	3	3	2	2	6	5	5	4	5	6	0	1	1
1	51	1	1	1	4	2	1	1	0	1	0	0	0	0	0	1	0	0	0	0	0	6	6	6	6	5	5	6	6	6	6	6	6	6	5	6	2	2	1	4	5	6	6	6	6	0	2	1
1	31	1	0	0	2	0	1	1	0	1	0	1	1	0	1	3	0	0	0	0	0	6	3	6	3	2	6	5	6	6	6	5	3	6	5	6	4	4	5	5	5	5	4	5	2	0	2	1
1	23	0	0	0	1	0	1	0	1	1	0	1	1	1	3	1	0	0	0	0	0	5	6	5	4	4	5	5	6	5	5	5	3	4	3	5	3	4	3	6	4	6	6	4	3	6	2	1
1	45	1	1	1	4	2	1	0	0	1	0	0	0	0	0	3	0	0	0	0	0	3	3	3	3	2	2	5	5	5	6	3	3	5	5	2	4	3	6	6	4	4	4	4	4	0	1	1
1	32	1	1	1	3	1	1	1	3	2	1	2	1	1	3	1	0	0	1	0	0	5	6	5	2	2	2	3	5	5	5	3	3	5	5	3	5	3	4	5	5	5	4	4	4	22	1	1
1	33	1	1	2	3	1	1	1	0	2	0	0	0	0	0	0	0	0	0	0	0	6	6	4	3	3	5	3	6	4	3	4	5	4	4	6	5	4	4	6	4	4	6	2	4	0	2	1
1	38	1	0	0	3	2	1	0	1	1	1	0	0	1	0	0	0	0	0	0	0	5	6	6	5	4	5	5	6	5	5	3	3	3	5	3	4	3	3	5	5	5	5	5	4	6	2	1
1	24	0	0	0	1	0	1	0	1	2	1	1	0	1	1	0	0	0	0	0	0	5	5	5	5	2	3	5	6	6	6	5	5	5	5	3	2	3	4	6	5	5	5	5	4	0	2	1
1	33	1	1	1	3	0	1	0	1	2	1	0	0	0	3	0	0	0	0	0	0	6	6	6	5	4	5	5	6	4	4	6	4	4	4	4	6	5	4	4	4	4	4	4	4	8	2	1
1	28	1	1	1	2	0	1	1	1	2	1	1	0	1	0	1	0	0	0	0	0	6	3	6	6	6	6	6	6	6	6	3	3	6	6	6	4	4	4	4	3	6	6	4	4	0	2	1
1	37	1	1	1	3	1	0	1	0	1	0	0	0	0	0	0	0	0	0	0	0	6	6	6	6	3	6	6	6	6	6	6	6	6	6	6	4	5	4	5	5	4	4	4	4	0	2	1
0	31	1	1	1	2	1	1	0	0	2	1	0	0	0	1	0	0	0	0	0	0	6	6	6	1	1	3	3	6	2	3	3	3	3	3	1	1	3	3	7	5	5	5	5	5	2	1	1
1	33	1	1	1	2	1	1	1	1	1	0	0	0	0	1	1	0	0	0	0	0	5	6	5	2	1	4	3	5	5	3	2	3	5	3	4	3	3	3	5	5	5	5	5	5	5	1	1
1	32	1	1	1	3	1	0	1	1	1	0	0	0	0	3	0	0	0	0	0	0	3	3	5	5	2	5	5	5	5	5	5	5	5	5	3	6	3	3	6	3	3	6	4	5	5	2	1
1	36	1	1	2	3	1	1	1	1	2	0	1	0	0	3	1	0	0	0	0	0	6	6	6	1	1	6	6	6	6	6	6	6	6	6	1	5	1	1	5	5	5	6	6	5	0	2	1
0	29	0	1	1	1	0	1	0	0	1	1	0	0	0	1	0	0	0	0	0	0	6	6	6	6	6	4	6	6	6	3	6	6	6	6	6	4	4	2	5	4	5	5	5	5	2	2	1
1	26	1	0	0	1	0	2	0	0	1	1	0	0	1	0	0	0	0	0	0	0	3	6	6	6	3	3	6	6	6	6	6	5	5	5	6	3	1	2	6	3	6	6	6	6	0	2	1
1	45	1	1	1	4	2	1	1	1	1	0	1	0	0	3	1	0	0	0	0	0	6	6	6	5	3	5	6	6	6	6	6	6	5	6	5	5	2	2	6	6	6	6	6	1	4	2	1
1	21	0	0	0	0	0	1	0	0	2	1	1	0	0	3	0	0	0	0	0	0	5	6	5	4	2	2	2	5	5	2	2	2	2	2	2	3	7	4	5	5	5	5	4	2	0	1	1
1	29	1	1	1	2	0	0	1	0	2	1	0	0	0	1	0	0	0	0	0	0	6	6	6	6	3	2	4	6	6	6	5	5	3	3	6	5	6	4	5	3	6	4	5	2	2	2	1
0	31	1	1	2	2	0	2	1	1	2	1	1	1	1	1	1	1	1	1	1	1	3	3	5	3	3	3	3	3	3	3	3	3	3	3	3	6	4	4	5	3	5	5	4	4	0	1	1
1	27	1	1	1	2	0	1	1	0	2	1	0	0	0	0	0	0	0	0	0	0	3	5	3	2	3	2	4	3	3	3	3	3	5	3	3	6	4	3	4	4	5	5	5	4	5	1	1
0	24	0	0	0	1	0	1	1	1	3	3	1	1	1	3	0	0	0	0	0	0	4	6	3	3	3	2	3	3	3	2	2	3	2	4	6	1	5	6	6	5	5	5	3	4	0	1	1
1	28	1	1	1	2	0	1	0	1	1	0	0	0	0	3	0	0	0	0	0	0	3	5	3	6	4	3	5	6	5	5	3	3	3	3	3	4	1	4	5	6	6	5	5	4	6	1	1
1	23	0	0	0	0	0	0	1	1	1	1	0	0	1	2	1	0	0	0	0	0	4	4	4	4	5	5	5	4	5	4	4	4	4	4	4	4	5	4	5	4	5	4	5	4	0	1	1
1	33	1	1	1	3	0	1	0	0	2	1	0	1	1	0	0	0	0	0	0	0	5	5	6	6	4	3	3	5	5	5	5	4	5	4	5	4	4	4	5	4	5	5	5	4	0	2	1
1	33	1	0	0	3	1	1	0	1	2	1	2	0	0	3	1	0	0	0	0	0	5	6	6	6	4	5	5	6	6	6	5	5	5	5	4	5	5	5	5	3	4	4	5	4	0	2	1
1	32	1	1	1	2	0	2	0	0	1	0	1	0	0	0	0	0	0	0	0	0	6	6	6	6	6	5	6	6	6	6	5	6	5	6	5	7	7	5	5	2	2	4	4	4	0	2	1
1	27	1	0	0	2	0	1	1	0	1	0	0	0	0	0	0	0	0	0	0	0	6	6	6	6	6	6	6	6	6	6	5	6	5	6	5	4	4	4	5	4	5	5	5	4	0	2	1
1	25	1	0	0	1	0	1	1	1	3	1	1	1	1	1	0	0	0	0	0	0	6	6	6	6	6	6	6	6	6	6	6	6	6	6	6	5	5	2	5	5	5	5	4	4	0	2	1
1	30	1	0	0	3	1	1	1	1	2	0	1	0	1	1	0	0	0	0	0	0	5	6	6	3	3	3	4	3	3	5	2	4	3	4	3	5	3	4	5	3	5	5	5	5	6	1	1
1	42	1	1	1	4	1	1	1	1	1	0	1	0	0	1	1	0	0	0	0	0	3	6	6	3	4	3	3	6	3	3	6	3	3	3	6	4	2	4	5	5	5	5	5	5	0	1	1
0	23	1	0	0	0	0	1	0	1	2	1	0	0	1	1	1	1	0	0	0	0	6	5	4	6	5	4	4	4	3	4	4	4	3	3	3	3	3	4	5	5	5	5	5	5	5	1	1
1	29	1	0	0	3	1	1	0	0	1	0	0	0	0	0	0	0	0	0	0	0	3	5	5	4	4	5	5	6	4	5	3	4	5	4	5	4	5	4	4	4	4	5	5	5	0	2	1
1	25	1	0	0	1	0	1	1	1	2	0	0	0	1	0	1	0	0	0	0	0	3	6	5	6	5	5	6	6	4	4	4	4	3	5	5	4	3	3	5	5	5	5	5	5	0	2	1
1	34	1	0	0	3	1	1	0	1	1	0	0	1	0	0	1	0	0	0	0	0	5	6	6	6	6	6	5	6	6	6	6	6	6	6	6	5	2	2	6	4	6	5	5	5	0	2	1
0	26	1	0	0	2	0	1	1	1	1	0	0	0	0	3	0	0	0	0	0	0	6	6	6	6	6	6	6	6	6	6	6	6	6	6	6	2	1	2	6	6	6	5	6	6	0	2	1
1	38	1	1	1	3	1	1	0	0	2	0	1	1	0	3	1	0	0	0	0	0	5	5	5	5	3	4	5	5	5	5	5	3	3	5	5	3	6	6	6	4	4	6	4	2	2	2	1
1	35	0	1	1	2	0	1	1	2	3	1	1	0	1	3	2	1	0	0	0	0	3	6	3	6	6	3	6	6	6	6	6	3	3	6	6	7	5	5	5	3	5	5	3	3	0	2	1
1	33	1	1	1	2	0	1	0	2	2	1	0	0	2	3	1	3	0	0	0	0	3	3	3	1	1	1	1	3	2	2	4	1	2	3	2	4	3	5	5	5	4	6	5	4	1	0	1
1	49	1	1	2	4	2	1	1	2	3	2	0	0	0	1	2	2	0	0	0	0	4	6	5	5	5	2	5	5	5	5	5	5	2	2	3	5	5	4	4	5	5	4	5	4	0	1	1
1	27	0	0	0	2	0	1	1	2	1	0	2	1	0	3	3	0	0	0	0	0	6	6	3	3	6	6	5	3	5	3	3	3	5	6	3	4	3	5	5	5	5	5	5	4	2	2	1
1	32	1	2	1	3	1	1	0	1	1	0	0	0	0	3	1	0	0	0	0	0	3	5	4	4	4	4	5	5	5	5	5	4	4	4	5	6	5	4	6	4	4	4	4	4	5	2	1
1	24	1	0	0	0	0	1	1	1	2	1	1	0	1	3	0	0	0	0	0	0	5	5	5	3	4	5	4	5	5	5	5	4	5	4	3	6	3	3	6	4	5	5	5	4	1	2	1
1	32	0	1	1	2	0	1	1	0	1	0	0	0	0	3	0	0	0	0	0	0	3	6	6	6	6	4	4	6	4	3	4	6	6	6	6	5	3	4	5	5	5	5	5	4	1	2	1
1	42	0	1	2	4	1	1	0	0	1	0	0	0	0	1	1	0	0	0	0	0	3	3	2	2	2	1	2	3	3	3	3	3	2	2	2	5	4	4	5	4	4	5	5	5	6	0	1
1	33	1	0	0	2	1	1	1	0	1	0	0	0	0	0	0	0	0	0	0	0	3	3	3	3	3	2	3	3	3	3	3	3	5	4	2	6	5	4	5	4	4	4	4	5	0	1	1
0	31	1	1	1	2	1	1	1	1	1	1	0	0	0	0	2	0	0	0	0	0	3	4	4	3	3	3	3	4	3	3	3	3	3	3	3	3	4	5	5	4	5	5	5	5	6	1	1
1	34	1	1	2	3	1	1	0	0	1	0	0	0	0	0	0	0	0	0	0	0	6	6	6	3	2	3	3	6	6	6	6	6	3	3	2	5	4	4	5	4	4	5	5	5	0	2	1
1	30	1	1	1	2	1	1	1	0	2	1	1	0	1	1	0	0	0	0	0	0	5	4	4	4	5	4	4	5	4	5	5	5	5	5	5	6	2	2	2	6	6	6	6	5	0	2	1
1	28	1	0	0	2	0	2	0	1	1	0	1	1	0	1	2	1	0	0	0	0	5	6	6	5	4	5	5	6	5	5	6	5	6	6	6	5	3	3	5	5	5	5	5	5	0	2	1
1	25	1	0	0	1	0	1	0	1	2	1	1	1	1	3	0	0	0	0	0	0	3	3	6	3	3	3	3	6	3	3	3	3	3	3	3	6	2	2	6	4	6	6	3	6	0	1	1
1	34	1	0	0	3	1	1	0	1	1	0	0	0	0	0	1	0	0	0	0	0	3	5	5	2	3	4	4	5	4	3	3	3	4	4	4	6	4	2	4	4	5	5	5	6	5	1	1
1	32	1	1	2	2	0	1	1	0	1	0	0	0	0	2	2	0	0	0	0	0	5	5	5	6	6	6	6	6	6	6	6	6	3	3	3	4	2	2	3	6	6	6	6	6	0	2	1
1	28	1	1	1	2	0	2	1	0	1	0	0	0	0	2	0	0	0	0	0	0	6	6	6	6	6	6	6	6	6	6	6	3	6	3	6	2	1	1	7	6	6	6	6	6	6	2	1
1	32	1	1	1	2	1	1	0	0	1	1	0	0	1	1	0	0	0	0	0	0	3	6	6	6	1	3	6	5	6	3	3	3	3	3	6	2	6	2	6	6	6	6	6	2	0	1	1
1	34	1	1	1	3	1	1	0	3	1	0	1	0	0	0	2	0	0	0	0	0	6	6	6	6	3	2	6	6	5	3	3	3	6	3	2	7	5	6	6	5	5	3	3	2	7	2	1
1	25	0	0	0	1	0	1	0	2	3	2	2	2	2	2	2	2	2	1	0	0	3	4	4	4	4	3	4	3	4	4	4	3	4	3	3	5	4	5	5	5	4	5	5	4	3	1	1
1	43	1	1	2	4	1	1	0	1	2	0	0	0	0	3	1	0	0	0	0	0	3	6	5	4	4	3	3	5	3	4	3	4	3	4	5	6	5	5	6	4	4	5	3	4	0	1	1
1	30	1	0	0	2	1	1	1	1	1	1	0	0	0	1	1	0	0	0	0	0	3	6	5	6	2	3	4	6	5	3	3	3	5	5	3	5	2	5	6	4	5	6	5	4	0	1	1
1	25	1	0	0	2	0	1	1	3	2	1	1	0	1	3	2	1	0	0	0	0	5	5	5	4	5	3	5	5	5	5	5	5	4	4	3	6	4	4	4	4	4	6	6	4	5	2	1
1	25	1	0	0	2	0	1	1	0	1	0	0	1	0	0	0	0	0	0	0	0	5	6	6	6	4	6	6	6	6	6	6	6	4	6	5	6	3	2	6	4	6	5	6	4	5	2	1
1	42	1	1	2	4	2	0	0	3	2	1	1	0	2	3	2	1	0	0	0	0	3	3	3	2	2	3	3	3	3	5	5	3	3	3	2	3	2	5	6	6	5	5	5	5	7	1	1
1	31	1	0	0	2	1	1	0	1	2	0	0	0	1	3	1	0	0	0	0	0	4	6	3	2	3	2	3	3	3	3	3	3	3	3	3	3	2	6	5	5	4	6	6	5	0	1	1
0	41	2	1	2	3	2	0	1	1	2	0	0	0	1	0	0	0	0	0	0	0	3	3	3	5	1	5	5	6	5	6	6	5	5	5	5	4	2	4	5	6	6	5	5	5	0	2	1
1	21	0	0	0	0	0	1	1	1	2	0	2	1	0	0	2	0	0	0	0	0	3	5	5	5	5	5	5	5	5	5	5	5	3	5	5	5	2	5	5	5	5	5	5	5	0	2	1
1	28	0	0	0	2	0	0	1	1	2	1	0	0	1	3	1	1	2	0	0	0	3	5	3	2	2	2	2	3	3	3	2	2	3	1	2	4	4	4	4	6	4	6	4	6	0	0	1
1	37	1	1	2	3	1	1	0	1	1	1	0	0	0	2	0	0	0	0	0	0	3	6	6	6	1	3	4	6	6	6	5	3	3	3	6	6	5	4	6	5	6	4	6	1	0	2	1
1	24	1	0	0	1	0	1	0	0	1	0	0	0	0	1	1	0	0	0	0	0	4	3	5	3	4	3	3	6	4	5	4	4	2	3	4	6	6	6	6	4	4	4	5	2	0	1	1
1	24	0	0	0	1	0	1	1	2	1	1	1	0	1	3	1	0	0	0	0	0	6	6	6	6	2	4	3	1	6	6	3	5	3	5	5	6	5	3	3	6	6	6	5	3	0	2	1
1	41	1	1	1	4	2	1	1	1	1	1	2	1	1	1	2	0	0	0	0	0	3	3	3	2	3	5	5	5	3	5	3	3	5	3	3	5	6	5	4	5	5	5	4	4	0	1	1
1	31	1	1	0	2	1	1	1	0	3	2	0	0	2	3	0	0	0	0	0	0	3	6	3	5	1	2	3	6	5	6	2	3	3	4	4	6	6	6	6	5	4	3	3	4	8	1	1
1	39	1	1	2	3	1	1	0	1	1	0	2	0	3	3	1	0	0	0	0	0	5	5	5	5	2	5	3	5	5	5	3	4	3	5	4	6	7	6	4	4	4	4	4	4	5	1	1
1	32	1	1	1	3	1	1	1	0	2	1	0	0	1	2	0	0	0	0	0	0	6	6	6	6	6	6	6	6	3	3	3	3	3	3	2	5	4	4	6	4	6	6	4	4	2	2	1
1	31	1	0	0	2	1	1	1	0	1	0	1	0	1	3	0	0	0	0	0	0	5	5	5	5	5	2	5	5	5	5	3	5	5	5	5	5	5	5	5	4	5	5	5	4	8	2	1
1	32	1	1	1	2	0	1	0	1	1	0	0	0	0	0	1	0	0	0	0	0	4	6	6	5	5	5	6	6	5	4	3	4	4	5	3	5	4	2	6	5	5	6	6	4	0	2	1
1	28	0	1	1	3	0	1	0	1	1	0	0	0	0	0	0	0	0	0	0	0	6	5	4	6	5	4	5	6	5	5	3	5	4	4	5	5	3	4	6	6	7	4	4	4	0	2	1
1	30	1	0	0	2	0	2	0	1	1	0	0	0	1	0	2	0	0	0	0	0	5	4	5	5	5	3	5	6	6	6	6	5	5	5	4	6	4	3	6	6	5	5	4	4	5	2	1
1	42	1	2	1	4	2	0	1	1	1	0	1	0	1	0	1	0	0	0	0	0	5	5	5	6	4	3	5	6	6	6	3	6	6	6	5	6	2	5	6	5	4	6	5	4	6	2	1
0	29	0	0	0	1	0	2	0	3	3	2	1	0	2	3	3	0	0	0	0	0	3	6	6	6	6	6	6	6	6	6	6	6	6	6	1	4	4	7	5	5	5	4	5	4	5	2	1
1	36	1	1	2	3	1	1	0	0	1	0	0	0	0	0	1	0	0	0	0	0	6	6	6	6	6	6	6	6	6	3	3	6	6	6	6	6	4	4	5	6	6	4	4	4	0	2	1
1	26	1	0	0	1	0	1	1	2	2	3	0	0	1	3	2	0	0	0	0	0	3	3	2	2	3	2	2	5	3	3	2	3	3	3	4	6	5	6	4	4	3	5	5	5	0	1	1
1	33	0	1	2	3	1	1	0	0	1	0	0	0	0	0	0	0	0	0	0	0	3	5	6	3	3	2	3	6	2	2	3	3	3	3	2	6	4	5	5	4	4	5	5	5	0	1	1
1	23	1	0	0	0	0	1	0	0	2	1	1	0	0	2	1	2	0	0	0	0	3	5	5	2	2	3	5	5	5	5	3	3	3	3	5	5	5	4	5	5	5	5	4	5	8	1	1
1	38	1	1	2	3	1	1	0	1	2	1	1	1	1	3	1	0	0	0	0	0	4	5	4	2	2	3	3	5	6	5	5	3	3	5	3	6	2	5	5	5	5	5	5	5	0	1	1
1	36	1	1	2	3	1	1	0	1	2	1	0	0	0	3	2	0	0	0	0	0	3	6	3	3	3	2	3	6	5	6	5	3	3	4	5	7	3	3	5	5	5	5	5	5	0	1	1
1	30	1	1	2	2	0	1	1	2	2	1	0	0	1	1	2	0	0	0	0	0	3	5	5	5	5	4	4	5	5	3	4	3	3	3	5	5	5	3	5	5	5	5	5	5	7	1	1
1	24	1	0	0	0	0	1	0	0	2	1	1	0	1	0	0	0	0	0	0	0	5	5	5	5	5	3	5	6	4	5	3	3	3	3	3	6	5	2	5	5	5	5	5	5	1	1	1
1	23	0	0	0	1	0	0	1	1	2	0	0	0	0	1	2	0	0	0	0	0	5	5	5	3	4	4	4	5	5	5	5	4	6	6	6	4	4	4	6	5	5	5	5	5	2	2	1
1	31	1	2	1	3	1	1	1	2	2	0	0	0	0	3	2	0	0	0	0	0	6	6	6	5	4	4	6	6	4	5	4	3	6	3	5	7	4	4	4	5	4	5	5	5	0	2	1
1	28	1	1	1	3	0	1	1	2	3	1	0	0	1	1	0	0	0	0	0	0	4	5	5	5	5	5	5	5	5	5	5	5	5	5	5	5	4	4	5	5	5	5	5	5	5	2	1
1	23	0	0	0	0	0	1	0	0	1	0	0	0	0	1	0	0	0	0	0	0	6	6	6	5	2	3	5	6	6	6	5	5	5	5	4	6	4	2	6	5	5	5	5	5	0	2	1
0	27	2	0	0	0	0	0	0	1	1	1	0	0	0	3	2	0	0	0	0	0	5	6	5	3	3	3	4	5	5	6	6	6	6	6	6	5	3	2	6	6	6	6	4	5	0	2	1
1	41	1	1	1	4	1	1	1	1	1	0	0	0	0	0	1	0	0	0	0	0	6	6	6	6	6	3	6	6	6	6	6	6	3	6	3	4	5	4	5	5	6	4	5	5	0	2	1
1	31	1	1	2	2	0	1	1	1	2	1	1	1	0	0	0	0	0	0	0	0	6	6	6	6	6	6	6	6	6	6	6	6	6	6	6	5	5	3	5	5	5	5	5	5	0	2	1
1	32	1	1	1	3	1	1	1	0	1	0	0	0	0	1	0	0	0	0	0	0	5	6	6	6	3	6	6	6	6	6	6	6	6	6	5	6	1	2	6	4	6	6	6	6	0	2	1
1	22	1	0	0	0	0	1	1	0	2	1	0	0	0	1	0	0	0	0	0	0	6	6	5	2	2	5	3	5	4	2	2	5	5	4	4	7	6	6	6	4	4	5	5	1	0	1	1
1	31	0	0	0	2	0	1	1	3	4	3	3	2	2	3	3	0	1	0	0	0	3	6	3	6	5	2	2	5	5	3	3	2	2	2	2	5	5	6	6	6	5	4	4	3	0	1	1
1	38	1	1	2	3	2	1	1	3	2	2	3	0	0	3	2	0	0	0	0	0	5	5	5	3	3	4	5	6	6	6	3	3	3	5	4	5	3	5	6	6	6	5	5	3	6	2	1
1	35	1	2	1	3	1	1	0	0	2	0	0	0	0	1	1	0	0	0	0	0	6	6	5	6	4	5	6	5	3	5	6	5	3	3	6	6	4	5	6	5	6	5	4	3	5	2	1
1	43	1	1	1	4	1	1	1	2	2	0	1	0	1	1	2	1	0	0	0	0	3	5	3	3	3	2	3	5	4	5	3	5	3	5	5	5	4	5	6	5	6	5	4	4	0	1	1
1	38	1	1	1	3	1	1	1	0	1	0	0	0	0	0	0	0	0	0	0	0	3	5	5	3	5	3	5	5	3	5	3	3	3	3	5	5	3	6	6	4	6	5	5	4	6	1	1
1	30	1	1	1	2	0	1	1	1	1	1	1	0	0	2	0	0	0	0	0	0	4	4	6	6	1	3	3	6	5	5	3	3	5	5	3	7	6	5	4	4	4	5	5	4	0	1	1
1	33	1	1	1	2	0	1	1	1	1	0	0	0	0	2	1	0	0	0	0	0	5	6	6	6	3	3	6	6	6	6	4	6	3	6	3	6	5	2	5	7	6	6	3	4	2	2	1
1	32	1	1	2	2	0	2	0	0	1	0	0	0	0	0	0	0	0	0	0	0	6	6	6	6	6	3	6	6	6	6	4	4	5	4	6	7	6	4	5	4	4	4	6	4	0	2	1
1	24	0	0	0	0	0	2	0	1	1	0	0	0	0	0	0	0	0	0	0	0	5	6	6	5	6	6	6	5	5	5	5	5	5	5	5	4	4	4	4	6	6	6	6	4	1	2	1
1	35	1	1	2	3	1	1	1	1	1	0	0	0	0	0	1	0	0	0	0	0	6	6	6	6	6	6	6	6	6	6	6	6	6	6	6	7	7	4	7	3	4	4	4	4	8	2	1
1	35	1	1	2	3	1	0	1	1	2	1	1	1	1	1	1	1	1	0	1	0	4	3	3	3	3	2	2	3	3	3	3	4	4	4	2	6	4	4	5	5	5	5	5	5	6	1	1
1	23	1	0	0	1	0	1	1	1	2	2	0	0	2	3	3	0	0	0	0	0	5	5	5	1	3	5	5	1	5	1	3	3	3	3	1	5	4	5	5	5	5	5	5	5	6	1	1
1	38	1	1	2	3	2	0	0	3	4	3	2	2	3	3	3	3	1	0	0	0	3	6	3	3	3	3	3	5	3	3	3	2	3	3	3	5	4	5	5	5	5	5	5	5	5	1	1
1	33	0	1	1	3	0	2	0	1	1	0	1	0	0	3	1	0	0	0	0	0	3	3	4	3	3	3	3	6	6	3	3	3	3	3	3	5	5	4	5	5	5	5	5	5	3	1	1
1	45	1	1	1	4	2	1	1	2	2	0	1	0	1	3	0	0	0	0	0	0	5	6	5	5	2	1	1	6	5	5	5	5	5	5	2	5	2	5	6	6	5	5	5	5	5	1	1
1	39	1	1	1	3	1	1	0	0	1	0	0	0	0	1	0	0	0	0	0	0	5	5	5	5	5	5	5	5	5	5	4	5	5	5	5	4	4	3	6	5	6	6	5	5	0	2	1
1	28	1	0	0	2	0	1	0	0	1	0	0	0	0	1	1	0	0	0	0	0	5	6	6	6	6	5	5	6	6	6	3	3	2	4	6	6	2	2	6	6	6	6	5	5	0	2	1
1	26	1	0	0	1	0	1	0	0	2	0	0	0	1	3	0	0	0	0	0	0	5	6	5	5	5	4	6	6	6	6	3	5	5	6	5	4	5	3	6	6	5	5	5	5	0	2	1
1	22	0	0	0	0	0	1	0	0	1	1	0	0	0	0	0	0	0	0	0	0	6	6	6	6	6	6	6	6	6	6	6	6	6	6	6	6	4	4	6	5	5	5	4	5	1	2	1
1	39	1	1	1	4	2	1	0	1	2	1	1	0	1	1	1	1	0	0	0	0	3	3	3	3	2	2	3	4	3	3	4	4	4	4	4	4	2	2	6	6	6	6	6	6	0	1	1
0	26	1	0	0	0	0	2	0	0	1	0	0	0	0	0	0	0	0	0	0	0	6	6	6	3	5	3	3	3	3	3	3	3	3	3	3	4	2	2	6	6	6	6	6	6	2	1	1
1	26	1	0	0	2	0	1	0	1	2	1	1	1	1	1	1	0	0	0	0	0	5	5	5	5	5	5	5	5	5	5	5	5	5	1	4	2	4	2	6	6	6	6	6	6	6	2	1
1	29	1	1	1	2	0	2	1	1	1	1	0	0	1	3	1	0	0	0	0	0	6	6	6	6	2	1	5	6	6	6	6	6	6	4	6	7	1	7	7	4	2	5	5	6	0	2	1
1	35	1	0	0	3	1	1	0	0	1	0	0	0	0	1	0	0	0	0	0	0	5	6	6	5	3	3	3	4	5	3	3	3	3	3	3	5	3	2	6	6	6	6	3	7	5	1	1
1	31	0	0	0	3	0	1	0	0	1	0	0	0	0	0	0	0	0	0	0	0	3	6	6	6	6	3	6	6	6	6	3	5	3	6	6	7	4	4	6	6	6	5	4	3	0	2	1
1	34	0	0	0	1	0	1	1	1	1	1	1	1	0	2	1	0	1	0	0	0	5	4	6	3	3	2	3	6	6	3	6	6	6	6	3	4	3	2	6	6	7	7	6	4	0	2	1
1	25	1	0	0	0	0	0	1	0	2	1	0	0	0	1	0	0	1	0	0	0	3	2	4	4	4	4	4	4	4	4	4	4	4	4	4	5	5	5	5	5	5	5	5	5	6	1	1
1	34	1	1	1	3	1	1	0	3	4	3	3	0	3	3	3	2	0	0	0	0	3	4	4	4	4	3	4	6	5	4	3	4	4	4	4	5	5	5	5	5	5	5	5	5	6	1	1
1	35	1	2	2	3	1	1	1	0	1	1	0	0	1	2	0	0	0	0	0	0	3	3	4	5	5	3	5	3	4	4	5	5	5	3	5	5	5	5	5	5	5	5	5	5	0	1	1
1	35	1	1	1	3	1	1	1	0	2	0	1	0	0	2	1	0	0	0	0	0	3	6	3	5	3	3	5	5	5	5	3	5	3	5	5	6	4	4	6	5	5	5	5	5	4	1	1
1	38	1	1	2	3	1	1	1	1	1	1	0	0	1	0	1	1	0	0	0	0	5	6	4	3	4	2	5	6	5	4	3	6	6	5	2	5	4	5	6	5	5	5	5	5	4	2	1
1	22	0	0	0	0	0	1	1	1	2	0	0	0	1	0	2	1	0	0	0	0	6	6	6	6	4	4	4	4	4	4	4	4	4	4	4	5	5	5	5	5	5	5	5	5	0	2	1
1	32	1	0	0	3	1	1	0	2	1	0	0	0	0	3	0	1	0	0	0	0	3	5	2	3	2	2	3	5	4	3	4	4	3	5	5	3	4	4	5	5	6	6	6	6	0	1	1
1	41	1	1	2	3	1	1	1	1	2	0	1	1	0	3	1	0	0	0	0	0	3	6	4	5	3	3	3	6	6	6	4	3	5	2	3	2	4	3	6	6	6	6	6	6	0	1	1
1	23	1	0	0	1	0	1	0	1	2	1	1	0	0	0	1	0	0	0	0	0	2	1	6	6	6	1	6	6	6	3	3	3	2	6	6	5	2	2	6	6	6	6	6	6	6	1	1
1	36	1	1	2	3	1	1	1	0	2	0	0	0	0	1	2	0	0	0	0	0	5	5	5	5	5	5	5	5	5	5	5	5	5	5	5	7	2	3	3	6	6	6	6	6	0	2	1
1	26	1	1	0	1	0	1	0	0	1	0	0	0	0	1	0	0	0	0	0	0	5	3	6	6	6	5	3	6	5	6	3	5	6	5	6	6	2	2	6	6	6	6	5	6	5	2	1
1	32	0	1	1	3	0	1	0	1	1	0	2	0	0	2	0	0	0	0	0	0	6	6	6	4	6	1	6	6	6	6	6	6	4	5	3	5	4	5	5	5	5	5	5	6	0	2	1
0	41	1	1	2	3	1	1	0	0	1	0	0	0	0	0	0	0	0	0	0	0	6	6	6	6	6	6	6	6	6	6	3	6	6	6	3	7	1	1	1	7	7	7	7	7	0	2	1
1	23	0	0	0	0	0	1	1	1	1	1	1	0	1	2	1	1	0	0	0	0	4	5	5	5	3	3	4	2	3	3	6	4	4	4	5	6	5	5	5	5	5	5	5	5	0	1	1
1	32	1	1	2	3	1	1	1	1	2	1	1	1	1	1	1	1	0	0	0	0	3	5	5	3	3	5	5	5	3	5	3	4	3	5	3	5	3	4	6	6	6	6	5	5	0	1	1
1	31	1	1	2	3	1	1	1	0	1	0	0	0	1	1	1	0	0	0	0	0	5	5	5	5	5	3	5	6	6	6	3	3	3	5	5	5	5	6	5	5	5	5	5	5	0	2	1
1	38	1	1	2	3	1	2	0	0	1	0	0	0	0	1	0	1	0	0	0	0	5	6	6	6	5	5	5	4	5	5	5	5	5	5	4	6	6	4	5	5	5	5	5	5	8	2	1
1	26	1	0	0	1	0	1	1	1	1	1	0	0	0	2	0	0	0	0	0	0	5	6	4	6	2	5	5	6	6	6	5	6	6	6	6	6	5	4	6	5	5	5	5	5	0	2	1
0	35	1	1	1	3	1	1	1	0	2	1	0	0	0	3	0	0	0	0	0	0	3	6	6	3	6	5	6	6	6	6	6	6	6	6	6	7	4	5	5	5	5	5	5	5	0	2	1
1	23	1	0	0	0	0	1	1	0	1	0	0	0	0	0	1	0	0	0	0	0	3	3	3	3	3	3	3	2	3	3	3	3	3	3	3	5	3	4	4	6	6	6	6	6	0	1	1
0	29	1	1	2	2	0	1	1	0	1	1	0	0	0	3	0	0	0	0	0	0	3	3	3	3	3	3	3	6	3	3	3	3	3	3	3	4	2	4	6	6	6	6	6	6	6	1	1
1	26	1	0	0	2	0	1	1	1	1	0	0	1	0	3	0	0	0	0	0	0	6	6	6	3	3	3	5	6	5	6	2	3	3	3	3	5	2	2	5	6	7	7	6	6	6	1	1
1	36	1	1	2	3	1	1	0	1	1	1	1	0	0	0	0	1	0	0	0	0	3	3	6	3	6	3	6	6	6	6	3	6	3	6	6	6	2	2	6	6	6	6	6	6	1	2	1
1	22	0	0	0	1	0	2	1	3	4	2	0	0	3	3	3	3	0	0	0	0	5	3	5	6	5	2	3	5	6	5	2	3	2	4	4	4	4	5	3	6	5	5	7	7	0	1	1
1	32	1	0	0	3	0	1	0	0	1	0	0	0	0	0	0	0	0	0	0	0	6	6	6	3	2	3	6	6	6	6	2	2	2	3	2	6	2	6	6	6	6	6	6	3	0	1	1
1	37	1	0	0	3	1	2	1	0	1	0	0	0	0	0	0	0	0	0	0	0	5	5	4	3	5	4	4	3	3	3	3	5	4	4	6	6	5	5	5	6	6	5	5	4	0	1	1
1	21	0	0	0	0	0	1	1	1	1	1	1	0	0	2	1	0	0	0	0	0	6	6	6	5	6	3	4	6	6	4	2	2	3	4	3	4	3	3	7	6	6	7	7	4	0	2	1
1	48	1	1	1	4	2	0	0	1	2	1	0	0	2	2	2	2	0	0	0	0	3	5	3	5	1	2	3	6	3	3	6	5	3	3	5	6	1	6	6	6	6	6	5	5	0	1	1
1	26	0	0	0	2	0	1	0	1	1	1	0	0	0	3	0	0	0	0	0	0	5	3	6	5	3	2	3	6	5	5	3	3	3	3	2	6	4	3	6	6	6	6	5	5	5	1	1
1	23	0	0	0	1	0	1	1	1	2	1	1	1	1	3	0	1	0	0	0	0	3	6	6	3	2	6	6	6	6	6	3	3	6	6	6	5	5	5	6	5	5	5	6	5	6	2	1
1	26	1	0	0	2	0	1	1	1	2	0	0	0	0	0	0	0	0	0	0	0	6	6	6	5	1	1	6	6	3	3	5	5	3	3	4	2	4	4	7	6	6	6	6	6	0	1	1
1	27	1	0	0	2	0	1	0	0	1	0	0	0	0	3	0	0	0	0	0	0	5	6	4	6	6	3	4	4	4	3	3	5	5	5	3	6	4	5	6	4	4	6	6	6	5	2	1
1	26	1	0	0	2	0	1	1	0	1	1	0	0	0	3	0	0	0	0	0	0	6	6	6	6	6	6	6	6	6	6	4	4	6	4	6	2	7	2	6	6	6	6	6	6	5	2	1
1	27	0	1	1	2	0	1	1	2	1	0	1	1	0	1	1	0	0	0	0	0	6	6	6	6	6	6	6	6	6	3	6	6	6	6	6	4	4	5	5	5	6	6	6	6	0	2	1
0	26	1	0	0	1	0	1	0	2	3	2	2	2	2	2	1	0	0	0	0	0	5	5	6	5	3	1	5	6	6	5	6	4	2	5	2	6	6	4	6	6	5	5	5	5	5	2	1
1	25	0	0	0	1	0	1	1	1	3	3	2	2	0	3	1	0	0	0	0	0	6	3	6	6	6	3	6	6	6	3	3	3	3	3	3	5	5	4	6	6	6	6	5	5	0	2	1
1	34	1	1	2	3	1	1	0	1	1	1	0	1	1	2	0	0	0	0	0	0	6	6	5	5	5	6	5	5	5	5	5	5	5	5	5	7	7	3	5	6	4	5	6	5	0	2	1
1	33	0	0	0	3	0	1	0	0	1	0	0	0	0	0	0	0	0	0	0	0	6	6	6	6	6	3	6	6	6	6	6	6	6	3	2	7	3	3	6	6	6	6	6	5	0	2	1
1	31	1	1	2	3	0	1	0	3	2	2	1	1	1	3	2	3	0	0	0	0	2	3	2	2	3	1	3	6	5	4	3	1	2	2	2	6	2	4	6	6	6	6	6	6	0	1	1
1	29	1	1	0	2	0	1	1	0	2	2	0	0	2	2	1	0	0	0	0	0	1	2	4	4	2	4	5	6	4	3	3	2	5	2	1	5	4	5	6	5	6	6	5	6	0	1	1
1	32	1	1	1	3	1	1	1	0	2	0	0	0	0	0	2	0	0	0	0	0	3	5	4	4	1	1	4	4	3	4	3	4	4	4	2	6	3	5	6	5	6	6	5	6	0	1	1
1	25	1	0	0	1	0	1	1	1	3	3	0	0	2	2	1	0	0	0	0	0	3	6	4	6	2	1	2	6	5	5	1	2	2	3	6	7	2	1	7	6	6	6	7	6	1	1	1
1	31	1	1	1	2	0	1	1	0	1	0	0	0	0	0	2	0	0	0	0	0	5	5	1	3	3	3	6	6	3	6	2	3	3	3	2	4	2	5	7	6	6	6	6	6	2	1	1
1	34	1	1	2	3	1	1	1	1	1	1	1	1	1	2	1	0	0	0	0	0	3	5	3	4	3	2	5	6	4	5	3	3	3	3	3	4	5	3	6	6	6	6	6	6	5	1	1
1	33	1	1	2	3	1	1	1	1	3	2	1	1	2	3	1	1	0	0	0	0	3	3	4	4	5	2	5	5	4	4	4	4	4	4	4	6	3	5	5	6	6	5	6	6	0	1	1
1	32	1	1	1	2	0	2	1	1	1	1	0	0	0	2	1	0	0	0	0	0	5	5	5	5	5	5	5	5	5	5	5	5	5	5	5	6	4	2	6	6	6	6	6	6	0	2	1
1	38	1	1	2	3	1	0	1	1	1	0	1	0	1	3	1	0	0	0	0	0	3	2	3	3	2	4	2	4	3	5	2	3	3	3	3	6	2	6	6	6	6	5	7	5	0	1	1
1	29	1	0	0	1	0	1	1	1	3	1	1	1	1	1	0	0	0	0	0	0	3	3	4	5	5	2	3	6	4	5	4	4	4	4	5	5	3	5	6	6	6	6	6	6	0	1	1
1	38	1	1	2	3	1	1	1	1	2	1	0	0	1	3	1	0	0	0	0	0	3	5	3	5	5	1	6	6	6	6	3	3	3	5	6	6	3	5	6	5	6	6	6	6	5	2	1
1	46	1	1	2	4	2	1	0	0	1	0	0	0	0	0	0	0	0	0	0	0	6	6	5	3	4	3	5	6	6	6	5	5	6	6	4	7	3	3	6	6	6	6	6	6	0	2	1
1	25	1	0	0	2	0	1	1	0	1	0	0	0	0	0	1	0	0	0	0	0	6	6	6	6	6	3	6	6	6	6	6	6	6	6	6	4	5	4	6	6	6	6	6	6	1	2	1
1	32	1	0	0	3	1	1	1	1	3	1	1	0	2	3	1	1	0	0	0	0	3	5	3	3	2	3	3	2	3	3	2	2	3	3	3	7	5	5	7	6	6	5	5	4	0	1	1
1	32	1	1	2	3	1	1	1	1	2	1	0	0	1	2	1	0	0	1	0	1	3	6	6	5	3	4	6	6	4	6	5	4	3	5	1	6	6	5	6	6	6	6	5	4	0	2	1
1	39	1	1	1	3	1	1	0	0	1	0	0	0	0	0	0	0	0	0	0	0	3	3	3	2	4	3	3	3	3	3	3	3	3	3	3	3	5	6	6	6	6	6	6	6	0	1	1
1	24	1	0	0	2	0	1	1	0	2	0	0	0	1	3	2	0	0	0	0	0	3	5	3	5	3	3	4	6	4	4	4	4	3	3	2	5	5	4	6	6	6	6	6	6	0	1	1
1	36	1	1	1	3	1	0	1	2	2	1	0	0	1	2	0	0	0	0	0	0	4	3	3	3	2	2	6	6	2	5	6	4	5	5	1	6	2	6	6	6	6	6	6	6	0	1	1
1	29	1	0	0	2	0	1	0	0	1	0	0	0	1	1	1	0	0	0	0	0	1	6	6	6	3	3	3	6	5	6	6	6	3	6	3	6	3	5	6	6	6	6	6	6	1	2	1
1	24	0	0	0	0	0	1	1	1	1	1	0	0	0	3	1	1	0	0	0	0	6	6	5	6	6	6	6	6	6	6	6	6	5	6	4	6	4	4	6	6	6	6	6	6	2	2	1
1	30	1	1	1	2	1	1	1	1	1	0	0	0	0	0	0	0	0	0	0	0	6	6	6	6	6	6	6	6	6	6	6	6	6	6	6	6	5	4	6	6	5	6	6	6	0	2	1
1	22	0	0	0	0	0	1	0	1	1	0	0	0	0	3	1	0	0	0	0	0	3	3	3	3	2	3	3	6	5	3	3	3	2	3	2	7	6	6	6	6	6	6	6	2	0	1	1
1	26	1	0	0	2	0	1	1	1	1	0	1	1	0	1	1	0	0	0	0	0	4	6	6	3	3	3	4	6	6	3	2	2	3	3	3	7	4	4	7	4	7	7	7	4	5	1	1
1	35	1	0	0	3	1	2	0	0	1	0	0	0	0	0	0	0	0	0	0	0	3	5	5	5	2	1	5	5	2	2	5	4	5	5	3	7	6	6	6	4	6	6	6	4	1	1	1
1	32	1	1	1	3	1	1	0	1	2	1	1	1	1	3	2	0	0	0	0	0	3	5	3	5	3	3	5	5	3	3	3	5	3	3	2	6	6	3	6	6	6	6	6	6	5	1	1
1	41	1	1	2	4	1	1	1	2	1	2	0	0	0	3	0	0	0	0	0	0	3	5	3	3	3	3	3	6	6	6	3	3	3	3	3	6	6	6	6	5	5	5	6	6	0	1	1
0	26	1	1	1	2	0	1	0	0	2	0	0	0	0	0	0	0	0	0	0	0	5	5	6	2	2	4	6	6	6	4	4	5	4	4	3	6	4	5	6	6	6	6	6	6	0	2	1
1	37	1	1	2	3	1	1	0	2	3	2	1	0	1	3	2	0	0	0	0	0	3	3	3	2	3	5	5	6	5	2	2	2	2	2	5	6	4	4	6	7	7	7	7	4	3	1	1
1	35	1	1	1	3	1	1	0	1	2	1	0	0	1	1	0	0	0	0	0	0	4	4	3	2	2	1	5	5	5	1	2	5	5	5	1	6	5	7	7	5	6	5	6	5	0	1	1
0	27	0	0	0	2	0	2	1	1	2	1	1	0	2	3	2	2	0	0	0	0	3	3	6	4	5	2	3	5	4	3	5	2	3	3	3	6	4	6	6	6	6	6	6	6	0	1	1
1	32	1	1	0	2	1	1	1	1	2	1	2	2	1	2	2	0	0	0	0	0	3	5	3	4	4	3	5	5	4	5	3	3	4	4	4	6	6	5	5	6	6	6	6	6	0	1	1
1	27	1	0	0	2	0	1	1	0	2	0	0	0	0	3	0	0	0	0	0	0	5	5	4	5	5	3	4	5	4	3	5	4	4	5	3	6	4	6	6	6	6	6	6	6	5	1	1
1	39	1	2	2	3	1	2	1	2	2	0	0	0	1	3	1	0	0	0	0	0	6	6	6	6	4	6	6	6	6	6	6	6	6	6	6	6	4	6	6	6	6	6	6	6	0	2	1
1	35	1	1	2	3	1	1	1	1	2	0	0	0	0	0	0	0	0	0	0	0	3	5	3	6	1	5	3	6	5	3	3	3	3	3	5	7	5	6	7	5	7	6	6	4	0	1	1
1	24	1	0	0	1	0	1	1	1	2	1	1	1	1	3	1	0	0	0	0	0	5	5	5	5	5	5	5	5	5	5	5	5	5	5	5	7	5	6	6	6	6	6	6	5	5	2	1
1	37	1	1	2	3	1	1	1	1	2	1	0	0	1	1	0	0	0	0	0	0	2	3	3	3	2	2	2	3	4	3	3	3	2	3	2	6	6	5	6	6	6	6	6	6	0	0	1
1	32	1	1	0	3	1	0	1	1	2	1	1	0	1	2	0	0	0	0	0	0	5	6	5	4	5	2	2	5	4	4	5	4	4	4	3	7	5	5	6	6	6	6	6	6	3	1	1
0	42	1	1	2	4	0	1	0	0	1	0	0	0	0	0	0	0	0	0	0	0	6	6	6	6	6	4	6	6	6	6	5	6	6	6	5	6	6	5	6	6	6	6	6	6	0	2	1
1	37	1	1	1	3	1	0	1	3	4	3	1	0	3	3	2	2	0	0	0	0	3	3	3	3	3	3	3	3	4	2	2	2	3	3	3	7	4	5	5	7	6	6	6	7	3	1	1
1	24	0	0	0	1	0	1	1	3	3	1	1	0	2	2	3	0	0	0	0	0	3	1	3	3	3	2	3	5	6	6	3	3	3	5	4	7	6	6	6	6	6	6	6	5	0	1	1
1	33	1	1	1	3	1	1	1	1	2	1	1	1	1	1	1	1	0	0	0	0	3	6	6	3	3	3	3	1	3	3	3	3	3	3	3	7	6	4	6	7	6	6	6	6	0	1	1
1	29	0	0	0	2	0	1	0	1	2	1	0	0	0	0	3	0	0	0	0	0	3	6	4	4	4	2	3	3	4	3	3	3	3	3	3	6	6	6	6	6	6	6	6	6	3	1	1
1	28	1	1	1	1	0	1	0	0	1	0	0	0	0	1	0	0	0	0	0	0	5	3	3	3	3	3	3	6	6	6	6	6	6	6	6	6	6	6	6	6	6	6	6	6	2	2	1
0	23	0	0	0	0	0	1	0	1	1	0	1	1	0	0	1	2	0	0	0	0	6	6	6	6	6	4	6	6	6	6	6	6	3	6	3	6	6	6	6	6	6	6	6	6	5	2	1
1	34	1	1	1	3	1	1	0	2	2	0	1	0	0	3	2	0	0	0	0	0	4	6	4	4	4	4	4	4	4	4	4	4	4	4	4	7	2	3	7	7	7	7	7	7	0	1	1
1	27	1	0	0	2	0	1	1	1	3	1	0	0	1	3	1	0	1	0	0	0	3	5	5	5	2	3	3	6	6	3	3	4	6	5	3	4	3	5	7	7	7	7	7	7	0	1	1
1	36	1	1	1	3	1	0	0	0	1	0	0	0	0	0	0	0	0	0	0	0	6	6	6	6	6	6	6	6	6	6	6	6	6	6	6	7	7	3	2	7	7	7	7	7	6	2	1
1	26	1	1	0	1	0	2	0	1	4	2	3	1	2	3	2	3	0	0	0	0	3	3	3	3	3	1	2	3	2	1	1	1	1	2	2	6	5	7	7	7	6	5	6	6	0	0	1
1	25	1	0	0	1	0	1	1	1	1	2	1	0	0	2	1	0	0	0	0	0	5	4	5	2	4	2	3	5	4	4	3	3	4	3	3	7	6	6	6	6	6	6	6	6	6	1	1
1	27	1	0	0	2	0	2	0	1	1	1	0	0	0	0	1	0	0	0	0	0	5	6	6	2	1	5	5	5	2	1	5	2	3	2	5	7	6	6	6	6	6	6	6	6	8	1	1
1	37	1	1	2	3	1	0	1	3	4	3	2	2	2	3	3	3	0	0	0	0	3	3	3	1	1	2	2	6	6	3	3	3	3	2	1	7	7	4	6	6	6	6	6	7	6	1	1
1	29	1	0	0	2	0	1	0	1	2	1	2	2	2	2	2	0	0	0	0	0	3	6	6	2	3	6	3	6	6	6	3	3	3	4	6	6	6	6	6	6	6	6	6	7	2	2	1
1	46	1	1	1	3	2	1	1	2	2	1	0	0	0	3	1	1	0	0	0	0	3	3	3	3	3	2	2	3	3	3	2	2	3	3	2	6	6	7	7	6	6	6	6	6	0	0	1
1	26	1	0	0	1	0	1	1	2	1	3	0	0	0	3	2	0	0	0	0	0	2	2	5	2	1	5	5	5	5	5	5	5	2	5	2	7	7	6	6	6	6	6	6	6	0	1	1
1	32	1	2	1	3	1	2	1	0	2	0	0	0	0	0	0	0	0	0	0	0	3	6	6	6	6	2	3	1	6	6	3	6	2	3	3	6	6	2	7	7	7	7	7	7	0	1	1
1	26	0	0	0	2	0	2	1	1	1	0	1	1	1	2	1	0	0	0	0	0	2	2	3	1	2	2	2	2	2	3	3	3	3	3	3	7	4	4	7	7	7	7	7	7	0	0	1
1	27	0	1	1	2	0	1	1	2	1	0	0	0	0	3	1	1	0	0	0	0	6	3	6	6	6	6	6	6	6	6	6	1	3	3	3	7	7	7	7	6	6	6	6	6	3	2	1
1	29	1	1	1	2	1	1	1	2	3	2	1	0	2	3	1	0	0	0	0	0	3	6	5	5	1	1	4	4	4	3	5	4	3	3	3	6	5	5	7	7	7	7	7	7	5	1	1
1	24	1	0	0	0	0	1	1	1	4	2	1	1	2	2	2	0	0	0	0	0	3	5	2	4	5	1	2	2	2	2	2	2	2	2	2	7	6	7	6	6	6	7	7	7	0	0	1
1	26	1	0	0	2	0	1	1	0	1	1	2	0	2	2	0	2	0	0	0	0	5	5	5	1	5	1	5	5	5	3	5	5	2	1	1	6	6	6	7	7	7	7	7	7	0	1	1
1	37	1	1	2	3	1	0	1	3	3	3	2	1	3	3	3	2	0	0	0	0	3	3	4	1	1	1	1	4	4	4	1	4	3	3	2	7	7	6	7	7	7	7	7	7	0	0	1
1	32	1	1	2	2	1	1	1	1	1	0	1	0	0	3	1	0	0	0	0	0	6	6	6	6	6	3	6	6	5	3	3	6	6	6	3	7	6	7	7	7	7	7	7	7	0	2	1
1	25	0	0	0	1	0	0	1	1	1	0	2	0	1	0	1	1	0	0	0	0	3	6	3	3	6	2	2	3	6	2	3	6	3	6	1	7	7	7	7	7	7	7	7	7	0	1	1
1	28	1	0	0	2	1	1	0	1	2	2	0	0	1	0	1	0	0	0	0	0	6	6	6	6	6	3	3	6	6	3	3	3	3	6	2	7	7	7	7	7	7	7	7	7	0	2	1
1	48	0	1	1	4	1	0	1	0	1	0	1	0	0	0	0	0	0	0	0	0	6	6	6	6	6	6	6	6	1	1	6	1	6	6	3	7	7	7	7	7	7	7	7	7	0	2	1
1	38	1	1	1	3	1	1	0	2	2	0	1	0	1	3	1	0	0	0	0	0	5	6	5	6	5	3	6	6	5	5	6	6	6	6	6	7	7	7	7	7	7	7	7	7	0	2	1
1	41	1	1	2	3	1	0	1	1	1	1	1	0	0	0	0	1	0	0	0	0	6	6	6	6	6	6	6	6	6	6	6	6	6	6	6	7	7	7	7	7	7	7	7	7	0	2	1
